# Supplementary material for: Design and synthesis of benzothiazole/thiophene-4H-chromene hybrids
Source: Royal Society of Chemistry journal article supplement (doi:10.1039/c8ra08262f), 2018-01-01
Supplement: c8ra08262f1.pdf [file c8ra08262f1.pdf]

## Supplementary data

### Design and Synthesis of benzothiazole/thiophene-4*H*-chromene hybrids

Pazhanivel Lakshmanan and Gnanasambandam Vasuki\*

Department of Chemistry, Pondicherry University, RV Nagar, Kalapet Pondicherry-605014,  
India.

Corresponding author E-mail: [vasukig@gmail.com](mailto:vasukig@gmail.com).

## Experimental section

**General information:** All chemicals were reagent grade purchased from Sigma Aldrich, Merck and Alfa Aesar used without purification. The reactions were monitored by thin layer chromatography (TLC) on pre-coated Aluminium plate of silica gel G/UV-254 of 0.25 mm thickness (Merck 60 F-254), spot were visualised under short UV light. NMR spectra were recorded on a Bruker Avance-II 400FT spectrometer at 400 MHz (<sup>1</sup>H) and 100(<sup>13</sup>C) IN DMSO using TMS as an internal reference. Mass spectra were recorded on a Water UPLC-TQD mass spectrometer. Melting points were determined by open glass capillary method and were uncorrected.

**4. General procedure for synthesis of 5-(2-amino-3-(benzo[d]thiazol-2-yl)-4H-chromen-4-yl)-2-thioxoimidazolidin-4-one derivatives.** To a stirred solution of ethanol were added a mixture of thiohydantoin (1.0equiv), benzothiazole acetonitrile (1.2equiv) and salicylaldehyde (1.0equiv) derivatives at room temperature with vigorous stirring for appropriate time (scheme 2). The precipitate was filtered, washed with ethanol 5ml x2. The product were obtained uncontaminated by TLC and spectral techniques.

**4a. 5-(2-amino-3-(benzo[d]thiazol-2-yl)-4H-chromen-4-yl)-2-thioxoimidazolidin-4-one:**

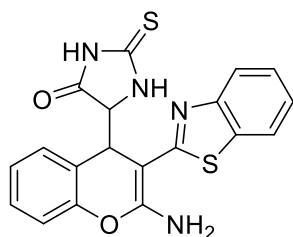

Pale yellow solid, yield 95%; m.p.=248-249°C; <sup>1</sup>H NMR (400 MHz, DMSO-d<sub>6</sub>): δ(ppm)=11.18(s,1H,NH), 10.37(s,1H,NH), 8.56(s,2H,NH<sub>2</sub>), 7.96(d, J=7.6Hz, 1H), 7.78(d, J=8.0, Hz, 1H), 7.42-7.32(m,3H), 7.24-7.20(m, 1H), 7.15-7.12(m,1H), 7.07(d, J=8.4Hz, 1H), 4.40(d, J=3.2Hz, 1H), 4.17(d, J=2.8Hz, 1H); <sup>13</sup>CNMR (DMSO-d<sub>6</sub>, 100 MHz)δ(ppm)=182.4, 174.0, 167.9, 157.5, 153.4, 149.4, 131.0, 129.0, 128.7, 126.1, 123.8, 122.5, 121.4, 119.7, 118.6, 115.7, 74.2, 63.8; HR-MS m/z: calcd for C<sub>19</sub>H<sub>14</sub>N<sub>4</sub>O<sub>2</sub>S<sub>2</sub> [M+H]<sup>+</sup>:395.0631 ; found:395.0634

**4b. 5-(2-amino-3-(benzo[d]thiazol-2-yl)-8-methoxy-4H-chromen-4-yl)-2-thioxoimidazolidin-4-one**

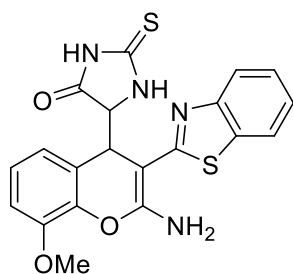

Yellow solid, yield 87%; m.p.=265-266°C; <sup>1</sup>H NMR (400 MHz, DMSO-d<sub>6</sub>): δ(ppm)=11.56(s, 1H,NH), 10.27(s,1H,NH), 8.57(s, 2H,NH<sub>2</sub>),7.97(q, J=4.0,7.2Hz, 1H), 7.79(d, J=8.0Hz, 1H), 7.42-7.38(m, 1H), 7.24-7.20(m,1H), 7.08-7.03(m, 2H), 6.69(q, J=2.0, 4.8Hz, 1H),4.54(d, J=2Hz, 1H), 4.28(d, j=2.0Hz, 1H), 3.84(s,3H);<sup>13</sup>C NMR (DMSO-d<sub>6</sub>, 100 MHz)δ(ppm)=183.2, 175.0, 167.6, 157.2, 153.5, 147.0, 139.7, 131.0, 126.1, 124.0, 122.6, 121.5, 119.7, 119.7, 119.2, 111.8, 75.6, 65.9, 55.7, 48.6, 40.6.HR-MS m/z: calcd forC<sub>20</sub>H<sub>16</sub>N<sub>4</sub>O<sub>3</sub>S<sub>2</sub> [M+H]<sup>+</sup>:425.0737; found:425.0730.

**4c. 5-(2-amino-3-(benzo[d]thiazol-2-yl)-8-ethoxy-4H-chromen-4-yl)-2-thioxoimidazolidin-4-one**

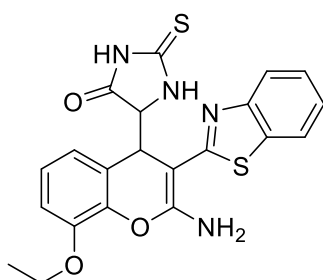

Pale yellow solid, yield 83%; m.p.=256-257°C; <sup>1</sup>H NMR (400 MHz, DMSO-d<sub>6</sub>): δ(ppm)=11.55(s,1H,NH), 10.28(s,1H,NH), 8.52(s,2H, NH<sub>2</sub>), 7.97(d, J=7.6Hz, 1H), 7.79(d, J=8.0Hz, 1H), 7.42-7.38(m,1H), 7.24-7.20(m, 1H), 7.05-7.00(m, 2H), 6.68(q, J=2.8,3.6Hz, 1H), 4.54(d, J=1.6Hz, 1H), 4.28(d, J=2.0Hz, 1H), 4.11(q, J=6.8,3.6Hz, 2H), 1.37(t, J=6.8,6.8Hz, 3H);<sup>13</sup>C NMR (DMSO-d<sub>6</sub>, 100 MHz)δ(ppm)=183.1, 175.0, 1167.6, 157.2, 153.5, 146.1, 140.0, 131.0, 126.1, 124.0, 122.6, 121.5, 119.7, 119.7, 119.2, 113.0, 75.7, 66.0, 64.2, 40.7, 14.7.HR-MS m/z: calcd for C<sub>21</sub>H<sub>18</sub>N<sub>4</sub>O<sub>3</sub>S<sub>2</sub> [M+H]<sup>+</sup>:439.0893;found:439.0899.

**4d. 5-(2-amino-3-(benzo[d]thiazol-2-yl)-4H-chromen-4-yl)-2-thioxothiazolidin-4-one**

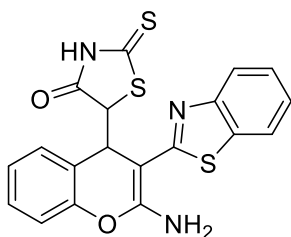

Yellow solid, yield 88%; m.p.=240-241°C; <sup>1</sup>H NMR (400 MHz, DMSO-d<sub>6</sub>): δ(ppm)=8.42(s,1H,NH<sub>2</sub>), 7.98(d, J=7.6Hz, 1H), 7.77(d, J=8.0Hz, 1H), 7.41-7.37(m, 1H), 7.35-7.27(m, 1H), 7.24(t, J=0.8,7.2Hz, 1H), 7.21-7.17(m, 1H), 7.11-7.06(m, 2H), 4.81(d, J=3.2Hz, 1H), 4.61(d, J=2.8Hz, 1H);<sup>13</sup>C NMR (DMSO-d<sub>6</sub>, 100 MHz)δ(ppm)=211.8, 188.9, 167.8, 156.5, 153.3, 150.4, 131.0, 128.6, 126.0, 124.0, 122.6, 1215, 120.4, 119.8, 115.4, 78.5, 66.2, 44.3.HR-MS m/z: calcd for C<sub>19</sub>H<sub>13</sub>N<sub>3</sub>O<sub>2</sub>S<sub>3</sub> [M+H]<sup>+</sup>:412.0243; found:412.0243.

**4e. 5-(2-amino-3-(benzo[d]thiazol-2-yl)-8-methoxy-4H-chromen-4-yl)-2-thioxothiazolidin-4-one**

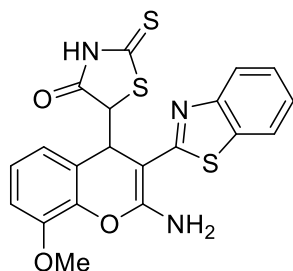

Yellow solid, yield 85%; m.p.=253-254°C; <sup>1</sup>H NMR (400 MHz, DMSO-d<sub>6</sub>): δ(ppm)=13.17(s,1H,NH), 8.59(s,2H,NH<sub>2</sub>), 7.99(d, J=7.6Hz,1H), 7.80(d, J=8.0Hz, 1H), 7.43-7.39(m,1H), 7.27-7.22(m, 1H), 7.13-7.06(m, 2H),6.73(q, J=1.6,5.6Hz, 1H),5.28(d, J=3.2Hz, 1H), 4.70(d, J=2.8Hz, 1H), 3.85(s, 3H); <sup>13</sup>C NMR (DMSO-d<sub>6</sub>, 100 MHz)δ(ppm)=176.9, 167.2, 156.7, 153.3, 147.0, 139.7, 131.5, 126.7, 124.4, 122.9, 121.6, 120.0, 119.9, 119.2, 112.1, 76.5, 63.0, 55.7, 48.6, 40.5. HR-MS m/z: calcd for C<sub>20</sub>H<sub>15</sub>N<sub>3</sub>O<sub>3</sub>S<sub>3</sub>[M+H]<sup>+</sup>:442.0348; found:442.0348.

**4f. 5-(2-amino-3-(benzo[d]thiazol-2-yl)-6-bromo-4H-chromen-4-yl)-2-thioxothiazolidin-4-one**

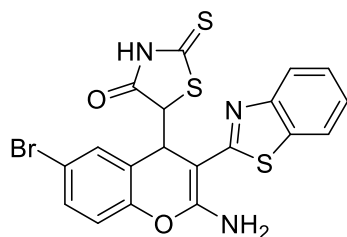

Yellow solid, yield 70%; m.p.=272-273°C; <sup>1</sup>H NMR (400 MHz, DMSO-d<sub>6</sub>): δ(ppm)=8.43(s,2H,NH<sub>2</sub>), 7.98(d, J=7.6Hz, 1H), 7.78(d, J=7.6Hz,1H), 7.80-7.40(m, 1H), 7.38(d, J=1.2Hz, 1H), 7.30(d, J=2.4Hz, 1H), 7.25-7.21(m, 1H), 7.06(d, J=8.8Hz, 1H), 4.82(d, J=3.2Hz, 1H), 4.58(d, J=2.8Hz, 1H); <sup>13</sup>C NMR (DMSO-d<sub>6</sub>, 100 MHz)δ(ppm)=211.8, 189.1, 167.5, 156.1, 153.2, 149.8, 131.3, 131.1, 131.0, 126.1, 122.9, 122.7, 121.5, 119.9, 117.7, 115.4, 78.0, 66.3,HR-MS m/z: calcd for C<sub>19</sub>H<sub>12</sub>BrN<sub>3</sub>O<sub>2</sub>S<sub>3</sub> [M+H]<sup>+</sup>: 489.9348; found:489.9344.

**4g. 4-(2-amino-3-(benzo[d]thiazol-2-yl)-4H-chromen-4-yl)-3-methyl-1H-pyrazol-5-ol**

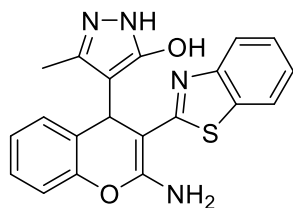

White solid, yield 93%; m.p.=245-246°C; <sup>1</sup>H NMR (400 MHz, DMSO-d<sub>6</sub>): δ(ppm)=10.47(s, 2H, NH,OH), 8.37(s, 2H, NH<sub>2</sub>), 7.87(d, J=8.0Hz, 1H), 7.74(d, J=8.4Hz, 1H), 7.34(t, J=7.2, 7.6Hz, 1H), 7.29(d, J=7.6Hz, 1H), 7.22-7.14(m, 2H), 7.07(q, J=7.2, 6.4Hz, 2H), 4.88(s, 1H), 2.04(s, 3H); <sup>13</sup>C NMR (DMSO-d<sub>6</sub>, 100 MHz)δ(ppm)=169.2, 159.4, 155.5, 152.9, 147.9, 136.1, 131.7, 129.9, 127.4, 125.7, 125.4, 124.2, 122.3, 121.1, 119.6, 115.4, 105.3, 78.14, 31.0, 10.1. HR-MS m/z: calcd for C<sub>20</sub>H<sub>16</sub>N<sub>4</sub>O<sub>2</sub>S [M+H]<sup>+</sup>: 377.1067; found: 377.1069.

**4h. 4-(2-amino-3-(benzo[d]thiazol-2-yl)-8-methoxy-4H-chromen-4-yl)-3-methyl-1H-pyrazol-5-ol**

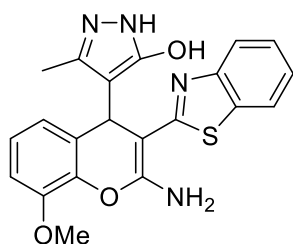

Pink solid, yield 83%; m.p.=263-264°C; <sup>1</sup>H NMR (400 MHz, DMSO-d<sub>6</sub>): δ(ppm)=10.45(s, 2H, NH,OH), 8.41(s, 2H, NH<sub>2</sub>), 7.86(d, J=8 Hz, 1H), 7.74(d, J=8Hz, 1H), 7.34(t, J=7.6, 7.6Hz, 1H), 7.15(t, J=7.6, 7.6Hz, 1H), 7.00(t, J=8.0, 7.6Hz, 1H), 6.87(q, J=8.4, 5.2Hz, 2H), 4.86(s, 1H), 3.83(s, 3H), 2.03(s, 3H); <sup>13</sup>C NMR (DMSO-d<sub>6</sub>, 100 MHz)δ(ppm)=169.2, 159.4, 155.5, 152.9, 146.7, 137.3, 136.1, 131.7, 126.1, 125.7, 123.8, 122.2, 121.1, 120.3, 119.6, 109.8, 105.2, 78.0, 55.6, 31.0, 10.1. HR-MS m/z: calcd for C<sub>21</sub>H<sub>18</sub>N<sub>4</sub>O<sub>3</sub>S [M+H]<sup>+</sup>: 407.1172; found: 407.1181.

**4i. 4-(2-amino-3-(benzo[d]thiazol-2-yl)-8-ethoxy-4H-chromen-4-yl)-3-methyl-1H-pyrazol-5-ol**

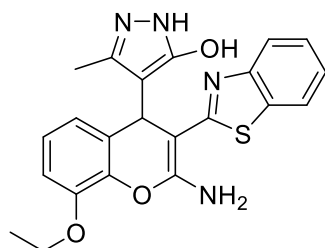

Pink solid, yield 78%; m.p.=218-219°C; <sup>1</sup>H NMR (400 MHz, DMSO-d<sub>6</sub>): δ(ppm)=10.44(s, 2H, NH,OH), 8.37(s, 2H, NH<sub>2</sub>), 7.86(d, J=7.6Hz, 1H), 7.74(d, J=8.0Hz, 1H), 7.36-7.32(m, 1H), 7.18-7.14(m, 1H), 6.97(t, J=10.8, 4.8Hz, 1H), 6.85(t, J=9.6, 8.4Hz, 2H), 4.85(s, 1H), 4.10(q, J=7.2, 6.8Hz, 2H), 2.03(s, 3H), 1.38(t, J=7.2, 6.8Hz, 3H); <sup>13</sup>C NMR (DMSO-d<sub>6</sub>, 100 MHz)δ(ppm)=169.2, 159.4, 155.5, 152.9, 145.9, 137.6, 136.1, 131.7, 126.2, 125.7, 13.8, 122.2, 121.1, 120.3, 119.5, 111.0, 105.3, 78.0, 64.0, 31.1, 14.7, 10.1. HR-MS m/z: calcd for C<sub>22</sub>H<sub>20</sub>N<sub>4</sub>O<sub>3</sub>S [M+H]<sup>+</sup>: 421.1329 ; found: 421.1334.

**4j. 4-(2-amino-3-(benzo[d]thiazol-2-yl)-5-(hydroxymethyl)-8-methyl-4H-pyrano[2,3-c]pyridin-4-yl)-3-methyl-1H-pyrazol-5-ol**

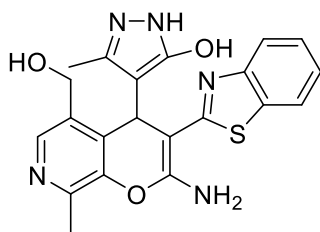

Pale yellow solid, yield 91%; m.p.=260-261°C; <sup>1</sup>H NMR (400 MHz, DMSO-d<sub>6</sub>): δ(ppm)=10.97(s, 1H,NH), 9.87(s, 1H, OH), 8.35(s, 2H, NH<sub>2</sub>), 8.16(s, 1H), 7.89(d, J=8.0, 1H), 7.74(d, J=8.0Hz,1H), 7.35(t, J=7.6,7.6Hz, 1H), 7.18(t, J=7.6,7.2Hz, 1H), 5.31(s, 1H, OH), 4.91(s, 1H), 4.70(d, J=14Hz, 1H), 4.39(d, J=14Hz, 1H), 2.53(s, 3H),2.15(s, 3H);<sup>13</sup>C NMR (DMSO-d<sub>6</sub>, 100 MHz)δ(ppm)=169.0, 159.3, 155.3, 152.9, 144.2, 143.5, 142.3, 136.7, 132.6, 131.5, 129.1, 125.8, 122.4, 121.1, 119.6, 130.0, 78.8, 58.0, 27.8, 18.7 , 10.2.HR-MS m/z: calcd forC<sub>21</sub>H<sub>19</sub>N<sub>5</sub>O<sub>3</sub>S [M+H]<sup>+</sup>: 422.1281; found:422.1289.

**7. General procedure for synthesis of 5-(2-amino-3-(thiophene-2-carbonyl)-4H-chromen-4-yl)-2-thioxoimidazolidin-4-one derivatives.** To a stirred solution of ethanol and water (1:1) ratio were added a mixture of 2-thenoyl acetonitrile(3-oxo-3-(thiophen-2-yl)propanenitrile) (1.2 equiv), thiohydantoin(1.0 equiv) and salicylaldehyde(1.0 equiv) derivatives at ambient temperature with vigorous stirring for appropriate time (scheme 5). The precipitate was filtered, washed with ethanol and water (1:1) ratio 10x3. The product were obtained, uncontaminated by TLC and spectral techniques.

**7a. 5-(2-amino-3-(thiophene-2-carbonyl)-4H-chromen-4-yl)-2-thioxoimidazolidin-4-one**

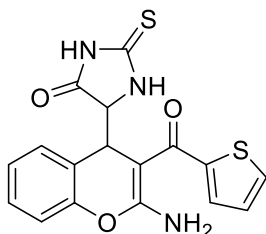

White solid, yield 92%; m.p.=233-234°C; <sup>1</sup>H NMR (400 MHz, DMSO-d<sub>6</sub>): δ(ppm)=11.49(s,1H,NH), 10.21(s,1H,NH), 9.37(s,2H,NH<sub>2</sub>), 7.78(d, J=4.8Hz,1H), 7.72(d, J=3.2Hz, 1H), 7.34-7.30(m,1H), 7.20(t, J=4.0,4.4Hz, 1H), 7.14-7.07(m, 3H), 4.90(d, J=0.8Hz,1H); <sup>13</sup>C NMR (DMSO-d<sub>6</sub>, 100 MHz)δ(ppm)=183.1, 180.3, 174.8, 165.0, 150.2, 146.2, 130.4, 1290, 128.2, 128.0, 127.9, 124.4, 120.0, 115.6, 83.90, 68.33, 37.95, HR-MS m/z: calcd for C<sub>17</sub>H<sub>13</sub>N<sub>3</sub>O<sub>3</sub>S<sub>2</sub> [M+H]<sup>+</sup>: 372.0471; found: 372.048.

**7b. 5-(2-amino-8-methoxy-3-(thiophene-2-carbonyl)-4H-chromen-4-yl)-2-thioxoimidazolidin-4-one**

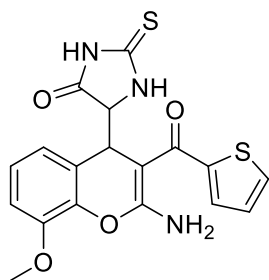

Yellow solid, yield 90%; m.p.=268-269°C; <sup>1</sup>H NMR (400 MHz, DMSO-d<sub>6</sub>): δ(ppm)=11.50(s,1H,NH), 10.21(s,1H,NH), 9.42(s,2H,NH<sub>2</sub>), 7.77(d, J=4.4Hz,1H), 7.70(d, J=9.6Hz,1H), 7.20(t, J=4.4,4.0Hz,1H), 7.04(d, J=6.0Hz,2H), 6.65(d, J=5.6Hz,1H), 4.89(d, J=7.2Hz, 1H), 4.32(d, J=8.0Hz, 1H), 3.83(s,3H); <sup>13</sup>C NMR (DMSO-d<sub>6</sub>, 100 MHz)δ(ppm)=183.1, 180.3, 174.8, 164.0, 146.8, 146.2, 139.4, 130.5, 128.0, 127.9, 124.3, 121.0, 119.4, 111.9, 83.7, 68.3, 55.9, 37.8. : HR-MS m/z: calcd for C<sub>18</sub>H<sub>15</sub>N<sub>3</sub>O<sub>4</sub>S<sub>2</sub> [M+H]<sup>+</sup>: 402.0577; found: 402.0584.

**7c. 5-(2-amino-8-ethoxy-3-(thiophene-2-carbonyl)-4H-chromen-4-yl)-2-thioxoimidazolidin-4-one**

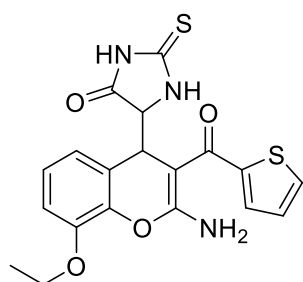

Yellow solid, yield 80%; m.p.=262-263°C; <sup>1</sup>H NMR (400 MHz, DMSO-d<sub>6</sub>): δ(ppm)=11.49(s,1H,NH), 10.22(s,1H,NH), 9.41(s,2H,NH<sub>2</sub>), 7.77(d, J=4.8Hz, 1H), 7.71(d, J=3.6Hz, 1H), 7.19(t, J=4.4,4.4Hz, 1H), 7.01(t, J=2.4,3.2Hz, 2H), 6.64(q, J=3.2,2.4Hz, 1H), 4.89(d, J=1.6Hz, 1H), 4.32(s, 1H), 4.10(q, J=7.2,6.8Hz, 2H), 1.35(t, J=6.8Hz, 3H); <sup>13</sup>C NMR (DMSO-d<sub>6</sub>, 100 MHz)δ(ppm)=183.1, 180.2, 174.8, 164.8, 146.3, 146.0, 139.7, 130.5, 128.0, 127.9, 124.3, 121.0, 119.4, 113.3, 83.8, 68.4, 64.3, 37.9, 25.5, 14.6. HR-MS m/z: calcdfor C<sub>19</sub>H<sub>17</sub>N<sub>3</sub>O<sub>4</sub>S<sub>2</sub> [M+H]<sup>+</sup>: 416.0733; found: 416.0743.

**7d. 5-(2-amino-5-(hydroxymethyl)-8-methyl-3-(thiophene-2-carbonyl)-4H-pyrano[2,3-c]pyridin-4-yl)-2-thioxoimidazolidin-4-one**

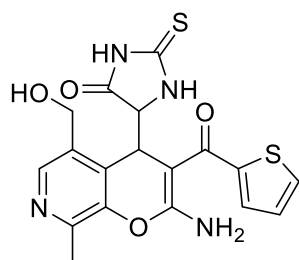

Pink solid, yield 89%; m.p.=259-260°C; <sup>1</sup>H NMR (400 MHz, DMSO-d<sub>6</sub>): δ(ppm)=11.50(s,1H,NH), 9.86(s,1H,NH), 8.87(s,2H,NH<sub>2</sub>), 8.25(s,1H), 7.69(t, J=4.4,0.8Hz,1H), 7.52(d, J=3.2Hz,1H), 7.06(q, J=4.0,0.8Hz, 1H), 5.46(d, J=4.8Hz,1H), 5.25(s, 1H), 4.66(d, J=4.8Hz, 1H), 4.61(d,J=4.0Hz, 1H), 4.36(d, J=0.8Hz, 1H), 2.51(s,3H); <sup>13</sup>C NMR (DMSO-d<sub>6</sub>, 100 MHz)δ(ppm)=183.4, 181.9, 173.5, 164.8, 145.8, 145.7, 145.4, 143.9, 131.4, 129.9, 129.8, 128.4, 127.2, 79.6, 66.6, 58.6, 34.8, 18.6. HR-MS m/z: calcd for C<sub>18</sub>H<sub>16</sub>N<sub>4</sub>O<sub>4</sub>S<sub>2</sub> [M+H]<sup>+</sup>: 417.0686; found: 417.0695.

**7e. 5-(2-amino-3-benzoyl-5-(hydroxymethyl)-8-methyl-4H-pyrano[2,3-c]pyridin-4-yl)-2-thioxoimidazolidin-4-one**

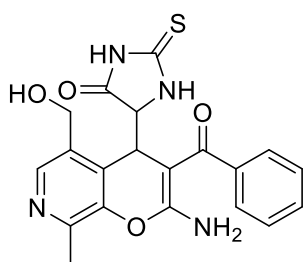

Pale yellow solid, yield 91%; m.p.=238-239°C; <sup>1</sup>H NMR (400 MHz, DMSO-d<sub>6</sub>): δ(ppm)=11.50(s,1H,NH), 9.76(s,1H,NH), 8.80(s, 2H,NH<sub>2</sub>), 8.23(s, 1H), 7.37-7.30(m, 5H), 5.38(t, J=4.8,4.4Hz, 1H), 4.72(d, J=2.8Hz, 1H), 4.52(d, J=3.6Hz, 2H), 4.29(s, 1H), 2.52(s, 3H); <sup>13</sup>C NMR (DMSO-d<sub>6</sub>, 100 MHz)δ(ppm)= 191.9, 183.4, 173.4, 164.8, 146.0, 145.9, 143.7, 140.5, 131.2, 130.3, 129.6, 127.9, 127.8, 79.5, 66.5, 58.5, 35.5, 18.7. HR-MS m/z: calcd for C<sub>20</sub>H<sub>18</sub>N<sub>4</sub>O<sub>4</sub>S [M+H]<sup>+</sup>: 411.1122; found: 411.1119.

**7f. 5-(2-amino-3-benzoyl-8-methoxy-4H-chromen-4-yl)-2-thioxoimidazolidin-4-one**

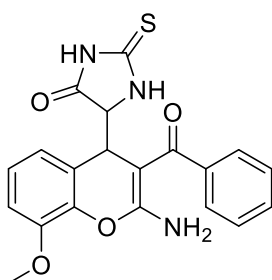

Yellow solid, yield 83%; m.p.=214-215°C; <sup>1</sup>H NMR (400 MHz, DMSO-d<sub>6</sub>): δ(ppm)=11.35(s,1H,NH), 9.95(s, 1H,NH), 9.13(s, 2H,NH<sub>2</sub>), 7.45-7.42(m, 3H), 7.36(q, J=3.6,3.6Hz,2H), 7.02(t, J=0.8,4.4Hz,2H), 6.54(t, J=4.4,4.8Hz, 1H), 4.29(d, J=2.8Hz, 1H), 3.9(d, J=1.6Hz, 1H), 3.83(s,3H); <sup>13</sup>C NMR (DMSO-d<sub>6</sub>, 100 MHz)δ(ppm)=192.1, 183.0, 174.1, 164.1, 146.9, 141.5, 139.7, 129.0, 128.4, 126.2, 124.2, 121.4, 119.5, 111.8, 82.7, 68.4, 55.8, 38.4. HR-MS m/z: calcd for C<sub>20</sub>H<sub>17</sub>N<sub>3</sub>O<sub>4</sub>S [M+H]<sup>+</sup>: 396.1013; found: 396.1021.



**7g. 5-(2-amino-3-(thiophene-2-carbonyl)-4H-chromen-4-yl)-2-thioxothiazolidin-4-one**

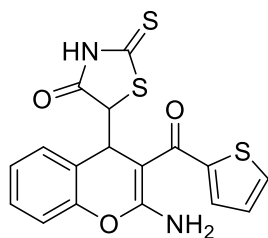

Yellow solid, yield 86%; m.p.=208-209°C; <sup>1</sup>H NMR (400 MHz, DMSO-d<sub>6</sub>): δ(ppm)=13.07(s,1H,NH), 9.28(s, 2H,NH<sub>2</sub>), 7.81(t, J=5.2, 4.4Hz, 2H), 7.38-7.35(m, 1H), 7.23-7.13(m, 4H)5.29(d, J=3.2Hz, 1H), 4.95(d, J=3.2Hz, 1H); <sup>13</sup>C NMR (DMSO-d<sub>6</sub>, 100 MHz)δ(ppm)=203.1, 180.9, 176.6, 164.1, 150.0, 145.5, 130.8, 129.4, 128.4, 128.2, 128.0, 124.7, 120.2, 115.8, 84.1, 65.1,38.0 HR-MS m/z: calcd for. C<sub>17</sub>H<sub>12</sub>N<sub>2</sub>O<sub>3</sub>S<sub>3</sub> [M+H]<sup>+</sup>: 389.0083; found: 389.0090.

**7h. 5-(2-amino-3-(thiophene-2-carbonyl)-4H-chromen-4-yl)thiazolidine-2,4-dione**

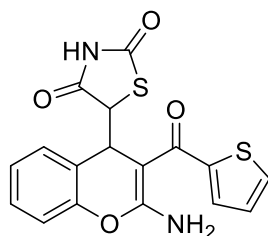

White solid, yield 78%; m.p.=223-224°C; <sup>1</sup>H NMR (400 MHz, DMSO-d<sub>6</sub>): δ(ppm)=12.03(s, 1H, NH), 9.30(s, 2H, NH<sub>2</sub>), 7.83(q, J=3.2,8.8Hz, 2H), 7.40-7.36(m, 1H), 7.23-7.14(m,4H), 5.31(d, J=2.8Hz,1H), 4.82(d, J=2.8Hz,1H); <sup>13</sup>C NMR (DMSO-d<sub>6</sub>, 100 MHz)δ(ppm)=180.8, 174.4, 171.5, 164.2, 150.2, 145.7, 130.9, 129.4, 128.4, 128.3, 128.1, 124.7, 120.0, 115.8, 84.2, 62.1, 37.8. HR-MS m/z: calcd for C<sub>17</sub>H<sub>12</sub>N<sub>2</sub>O<sub>4</sub>S<sub>2</sub> [M+H]<sup>+</sup>: 373.0311; found: 373.0322.

**7i. 5-(2-amino-8-methoxy-3-(thiophene-2-carbonyl)-4H-chromen-4-yl)thiazolidine-2,4-dione**

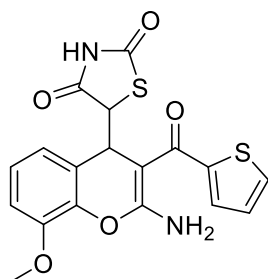

Yellow solid, yield 72%; m.p.=249-250°C; <sup>1</sup>H NMR (400 MHz, DMSO-d<sub>6</sub>): δ(ppm)=12.02(s,1H, NH), 9.36(s,2H, NH<sub>2</sub>), 7.84-7.81(m, 2H), 7.22(q, J=4.0,5.2Hz, 1H), 7.13-7.06(m, 2H), 6.70(q, J=2.0, 5.2Hz, 1H), 5.30(d, J=3.2Hz, 1H), 4.82(d, J=3.2Hz, 1H); <sup>13</sup>C NMR (DMSO-d<sub>6</sub>, 100 MHz)δ(ppm)=180.8, 174.3, 171.5, 164.1, 146.9, 145.6, 139.3,

130.8, 128.3, 128.1, 124.6, 121.0, 119.4, 112.1, 84.1, 62.0, 55.7, 37.9. HR-MS  $m/z$ : calcd for  $C_{18}H_{14}N_2O_5S_2$   $[M+H]^+$ : 403.0417; found: 403.0426.

**7j. 5-(2-amino-8-ethoxy-3-(thiophene-2-carbonyl)-4H-chromen-4-yl)thiazolidine-2,4-dione**

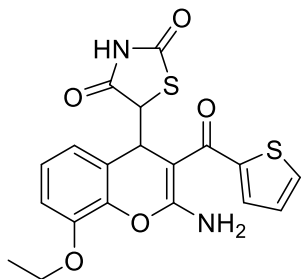

Yellow solid, yield 70%;  $m.p.$ =236-237°C;  $^1H$  NMR (400 MHz,  $DMSO-d_6$ ):  $\delta$ (ppm)=12.02(s,1H,NH), 9.35(s,2H, $NH_2$ ), 7.83(q,  $J$ =3.6,4.8Hz, 2H), 7.22(q,  $J$ =4.0,1.2Hz, 1H), 7.07(t,  $J$ =4.4,2.0Hz, 2H), 6.69(q,  $J$ =2.8,3.6Hz,1H), 5.29(d,  $J$ =2.8Hz, 1H), 4.82(d,  $J$ =3.2Hz, 1H), 4.13(q,  $J$ =7.2,3.6Hz, 2H), (t,  $J$ =6.8,6.8Hz, 3H);  $^{13}C$  NMR ( $DMSO-d_6$ , 100 MHz) $\delta$ (ppm)=180.0, 174.4, 171.6, 164.1, 146.1, 145.7, 139.6, 130.9, 128.3, 128.1, 124.6, 121.1, 119.5, 113.3, 84.2, 64.3, 62.1, 37.9, 14.6. HR-MS  $m/z$ : calcd for  $C_{19}H_{16}N_2O_5S_2$   $[M+H]^+$ : 417.0573; found: 417.0555.

**7k. 3-(2-amino-3-(thiophene-2-carbonyl)-4H-chromen-4-yl)indolin-2-one**

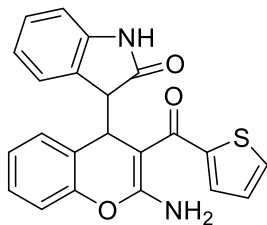

Pale yellow solid, yield 80%;  $m.p.$ =256-257°C;  $^1H$  NMR (400 MHz,  $DMSO-d_6$ ):  $\delta$ (ppm)=10.41(s,1H,NH), 9.45(s, 2H, $NH_2$ ), 8.08(d,  $J$ =3.6Hz, 1H), 7.81(q,  $J$ =0.4,4.4Hz, 1H), 7.24(q,  $J$ =3.6,1.2Hz, 1H), 7.20(q,  $J$ =1.6,6.4Hz, 1H), 7.10-7.06(m,2H), 7.02-6.97(m,2H), 6.82-6.77(m,2H), 6.52(d,  $J$ =8.0Hz, 1H), 5.14(d,  $J$ =3.2Hz,1H), 3.67(d,  $J$ =3.2Hz, 1H);  $^{13}C$  NMR ( $DMSO-d_6$ , 100 MHz) $\delta$ (ppm)=180.6, 176.9, 164.6, 148.9, 146.9, 142.8, 131.0, 128.4, 128.4, 127.9, 126.5, 124.1, 123.8, 121.5, 121.0, 115.1, 109.0, 85.1, 62.0, 54, 37.0, 25.5. HR-MS  $m/z$ : calcd for  $C_{22}H_{16}N_2O_3S$   $[M+H]^+$ : 389.0954; found: 388.0935.

**7l. 3-(2-amino-8-ethoxy-3-(thiophene-2-carbonyl)-4H-chromen-4-yl)indolin-2-one**

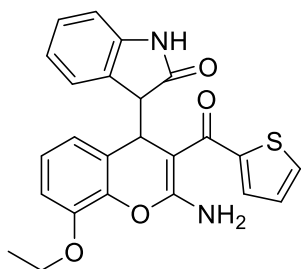

Yellow solid, yield 74%; m.p.=271-272°C; <sup>1</sup>H NMR (400 MHz, DMSO-d<sub>6</sub>): δ(ppm)=10.40(s,1H, NH),9.51(s,2H,NH<sub>2</sub>),8.07(d, J=3.2Hz, 1H), 7.81(q, J=0.8,4.4Hz, 1H), 7.23(q, J=4.0,1.2Hz, 1H), 7.06(d, J=7.6Hz, 1H), 7.00(t, J=7.6,7.6Hz, 1H), 6.90(t, J=8.0,7.6Hz, 1H), 6.81-6.75(m,3H), 6.55(d, J=8.0Hz, 1H), 5.13(d, J=6.8Hz, 1H), 3.93(q, J=6.8,10.4Hz, 2H), 3.66(d, J=28Hz, 1H), 1.20(t, J=6.8,68Hz, 3H); <sup>13</sup>C NMR (DMSO-d<sub>6</sub>, 100 MHz)δ(ppm)=180.6, 176.8, 164.5, 146.9, 145.5, 142.8, 138.7, 131.0, 128.4, 128.3, 127.9, 126.5, 124.0, 123.8, 122.7, 121.0, 119.6, 113.1, 109.0, 85.0, 64.3, 54.1, 37.0, 14.5. HR-MS m/z: calcd for C<sub>24</sub>H<sub>20</sub>N<sub>2</sub>O<sub>4</sub>S [M+H]<sup>+</sup>: 433.1217; found: 433.1225.

**7m. (2-amino-4-(5-hydroxy-3-methyl-1H-pyrazol-4-yl)-5-(hydroxymethyl)-8-methyl-4H-pyrano[2,3-c]pyridin-3-yl)(thiophen-2-yl)methanone**

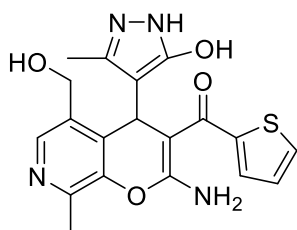

Pink solid, yield 84%; m.p.=235-236°C; <sup>1</sup>H NMR (400 MHz, DMSO-d<sub>6</sub>): δ(ppm)=10.92(s,1H,OH), 9.46(s, 1H,NH), 8.90(s, 2H,NH<sub>2</sub>), 8.11(s,1H), 7.71(d, J=4.8Hz, 1H), 7.59(d, J=3.6Hz, 1H), 7.12(t, J=4.4, 4.0Hz, 1H), 5.54(s,1H), 5.29(s, 1H), 4.48(q, J=5.2,8.0Hz, 1H), 4.30(d, J=11.6Hz, 1H), 1.52(s,3H); <sup>13</sup>C NMR (DMSO-d<sub>6</sub>, 100 MHz)δ(ppm)=183.5, 163.2, 144.9, 144.3, 144.2, 142.6, 132.2, 131.1, 129.0, 127.8, 127.2, 104.6, 86.4, 58.1, 56.0, 25.9, 18.5,18.5, 8.7. HR-MS m/z: calcd for C<sub>19</sub>H<sub>18</sub>N<sub>4</sub>O<sub>4</sub>S [M+H]<sup>+</sup>: 399.1122; found: 399.1132.

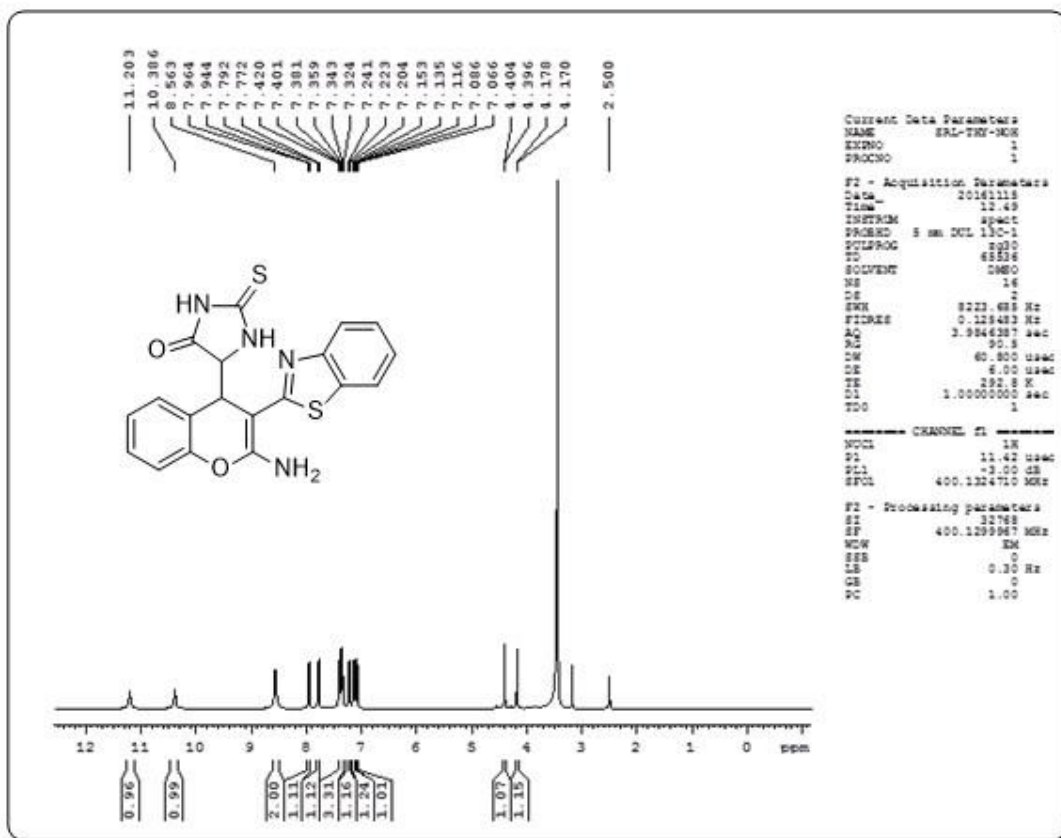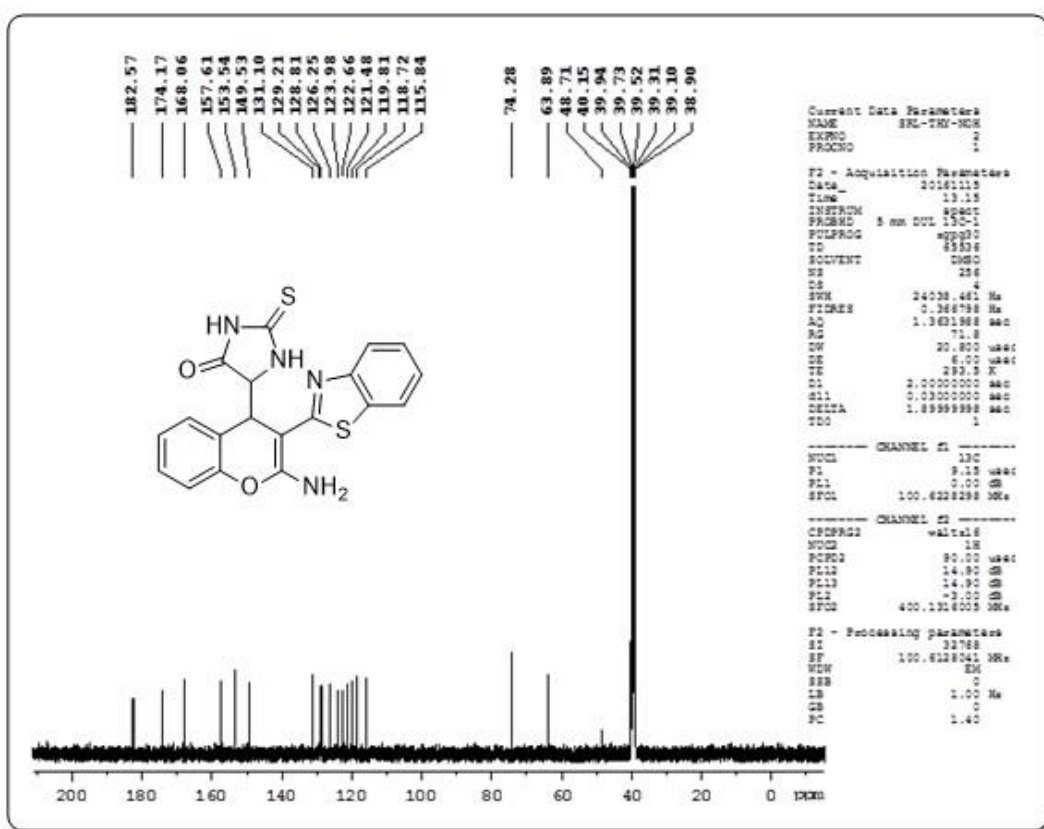

**Fig 5:**  $^1\text{H}$ ,  $^{13}\text{C}$  spectrum of 5-(2-amino-3-(benzo[d]thiazol-2-yl)-4H-chromen-4-yl)-2-thioxoimidazolidin-4-one **4a**

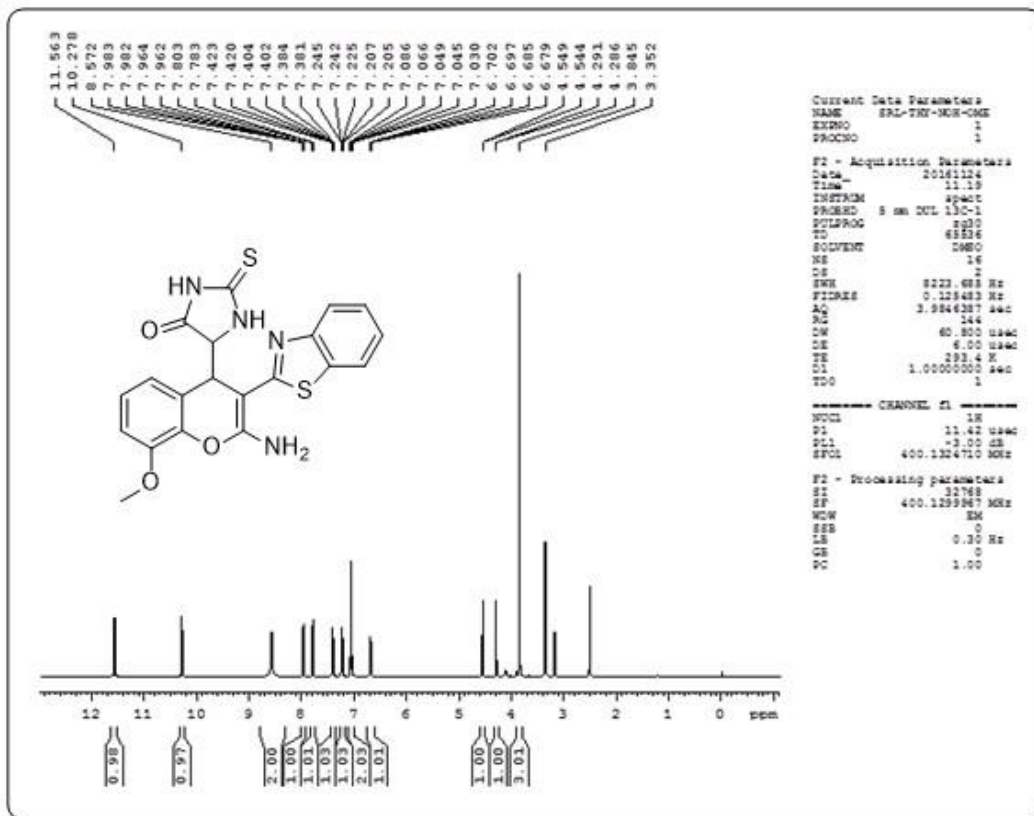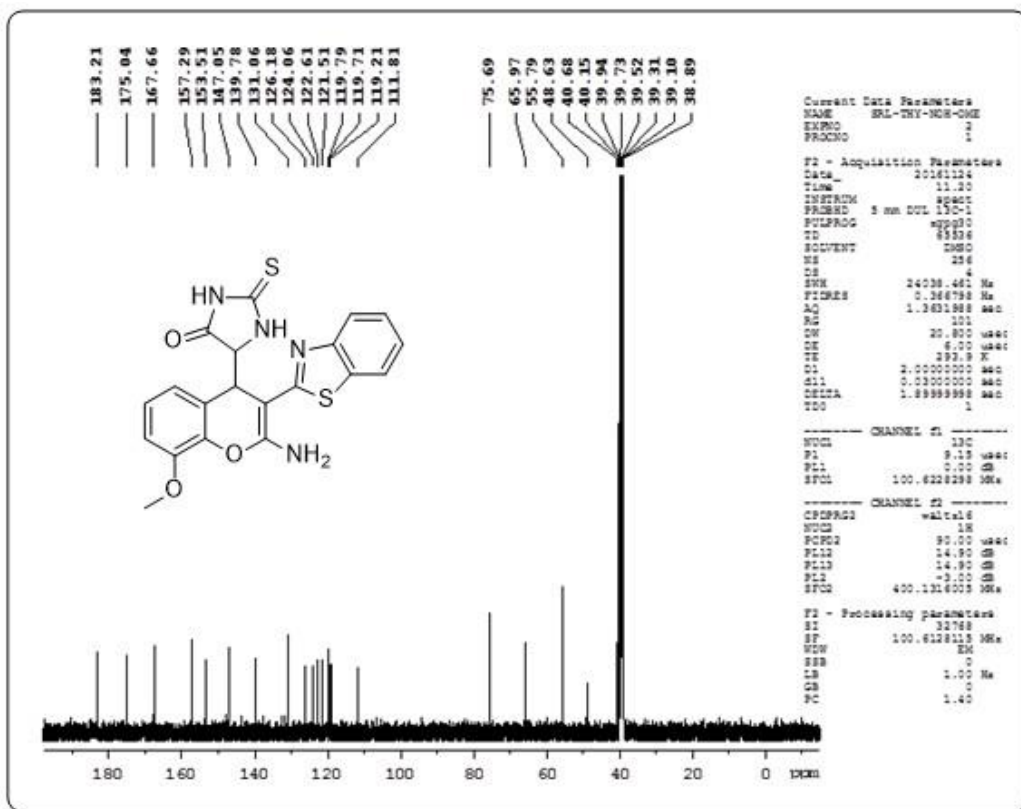

**Fig 6:**  $^1\text{H}$ ,  $^{13}\text{C}$  spectrum of 5-(2-amino-3-(benzo[d]thiazol-2-yl)-8-methoxy-4H-chromen-4-yl)-2-thioxoimidazolidin-4-one **4b**

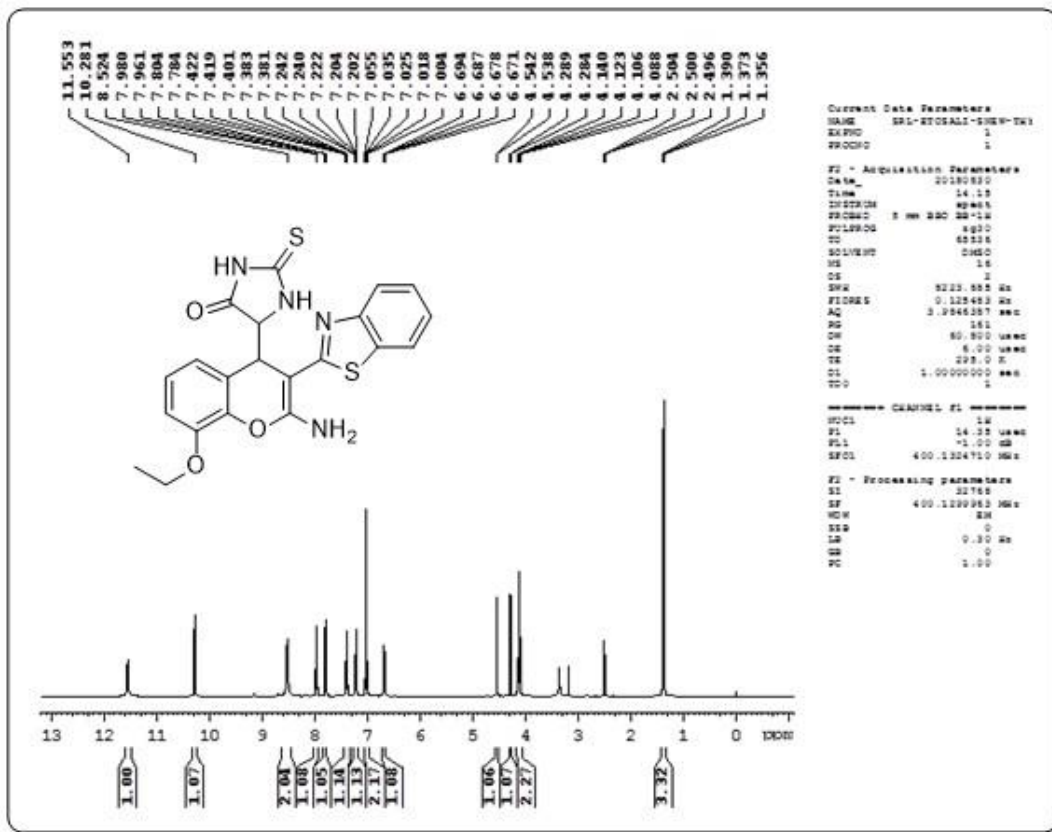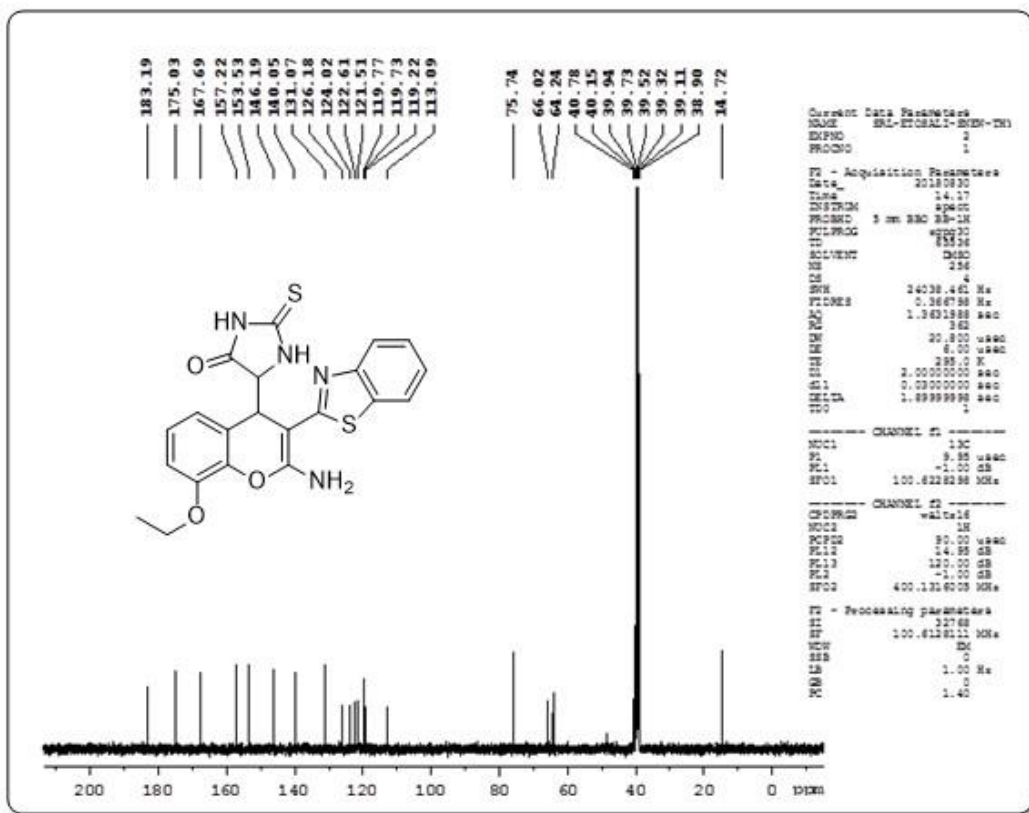

**Fig 7:**  $^1\text{H}$ ,  $^{13}\text{C}$  spectrum of 5-(2-amino-3-(benzo[d]thiazol-2-yl)-8-ethoxy-4H-chromen-4-yl)-2-thioxoimidazolidin-4-one **4c**

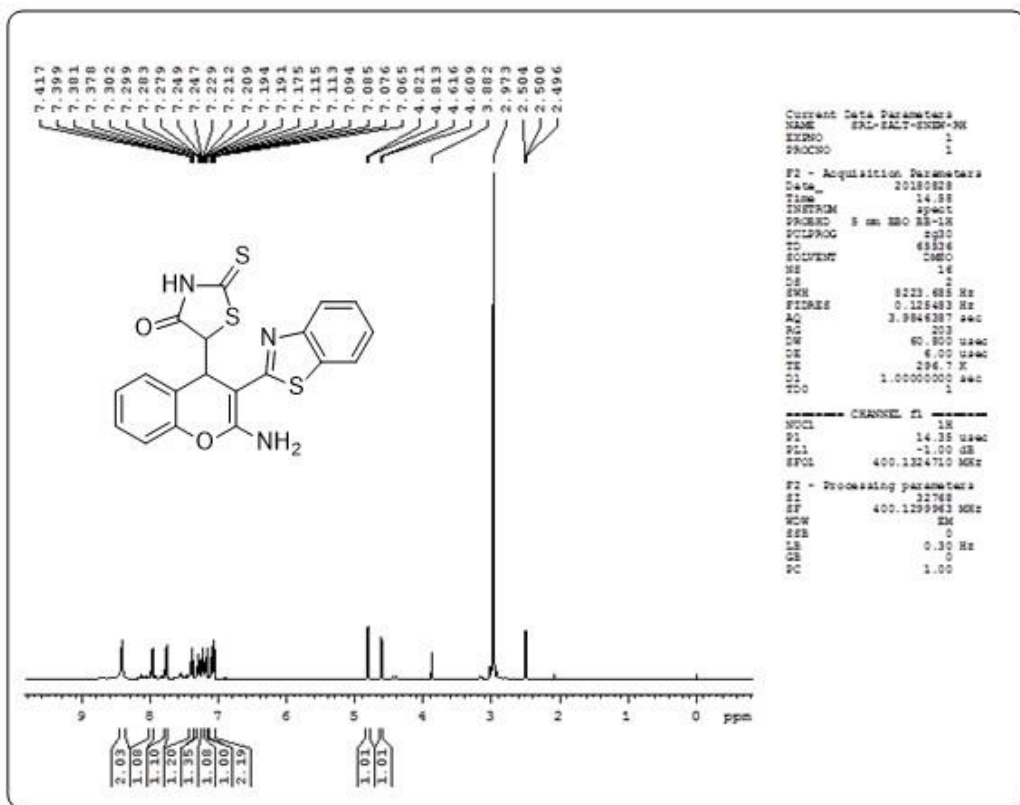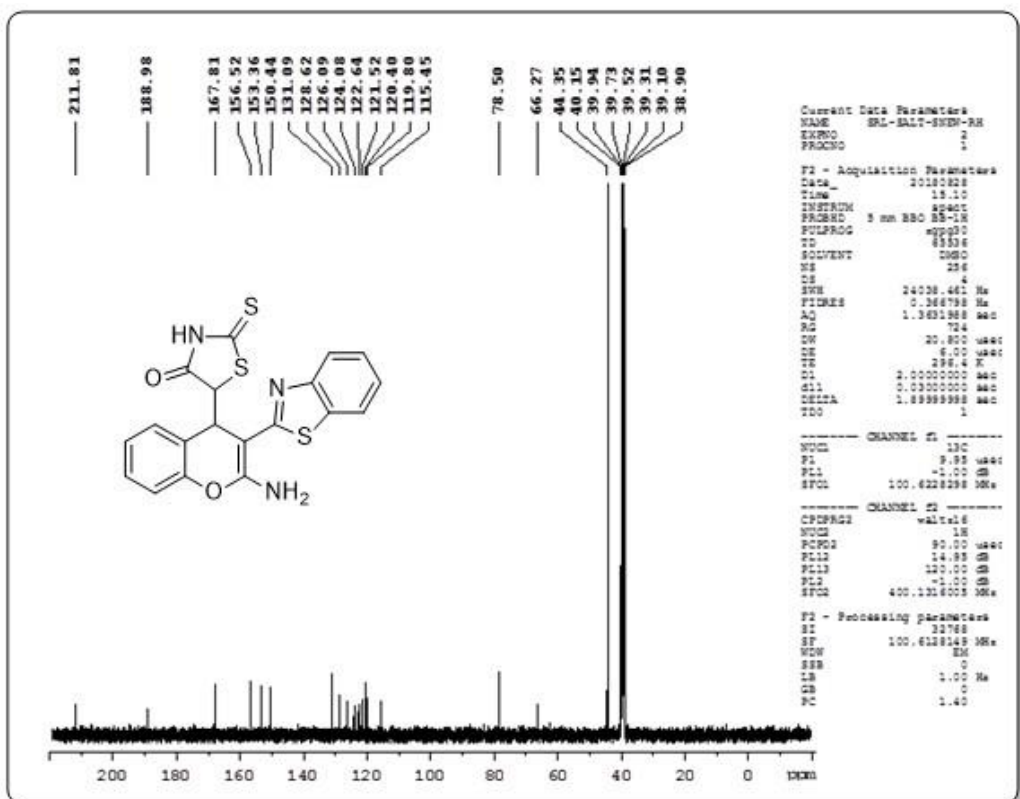

**Fig 8:**  $^1\text{H}$ ,  $^{13}\text{C}$  spectrum of 5-(2-amino-3-(benzo[d]thiazol-2-yl)-4H-chromen-4-yl)-2-thioxothiazolidin-4-one **4d**

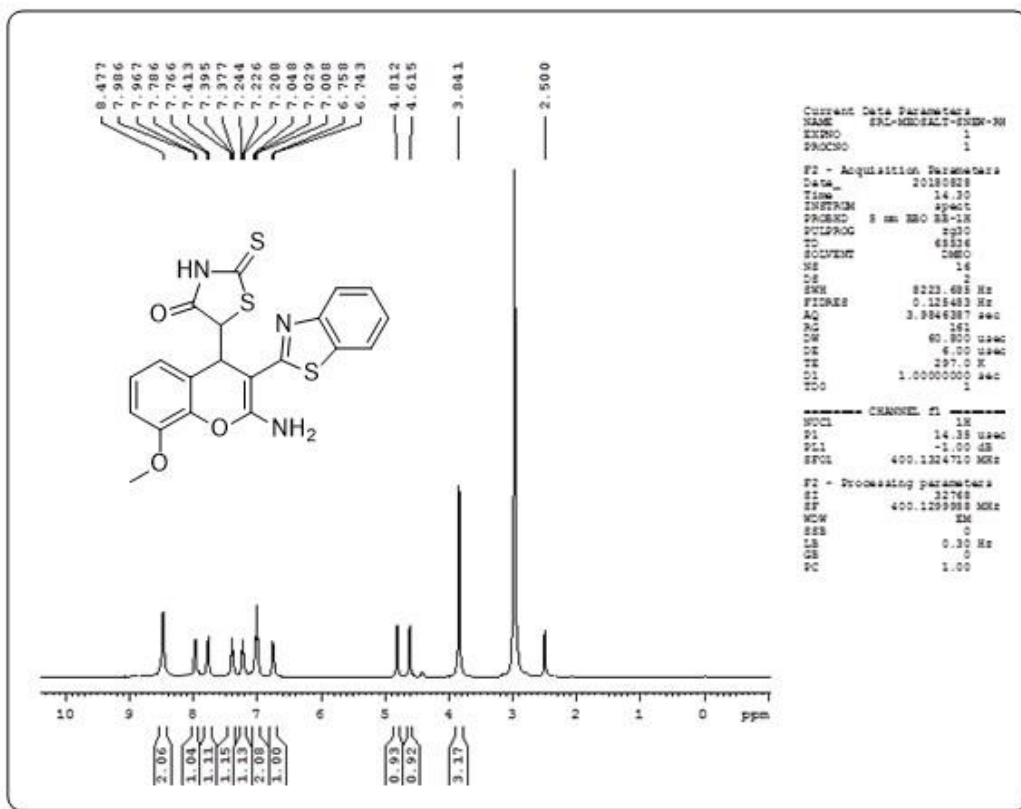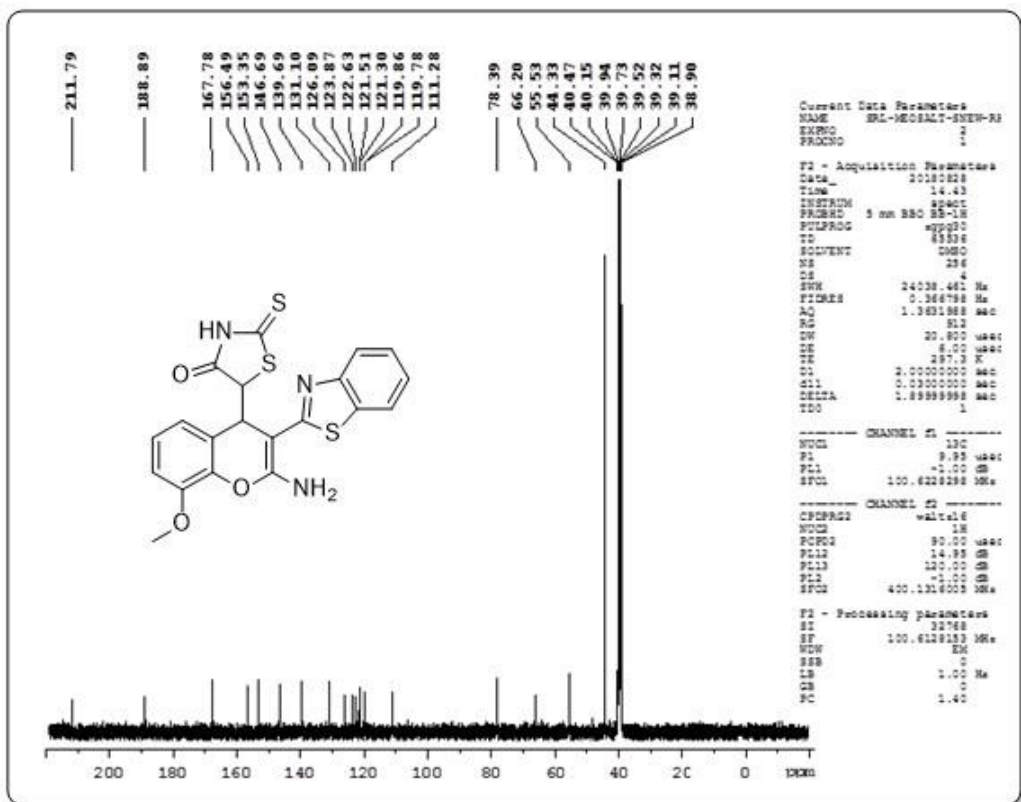

**Fig 9:**  $^1\text{H}$ ,  $^{13}\text{C}$  spectrum of 5-(2-amino-3-(benzo[d]thiazol-2-yl)-8-methoxy-4H-chromen-4-yl)-2-thioxothiazolidin-4-one **4e**



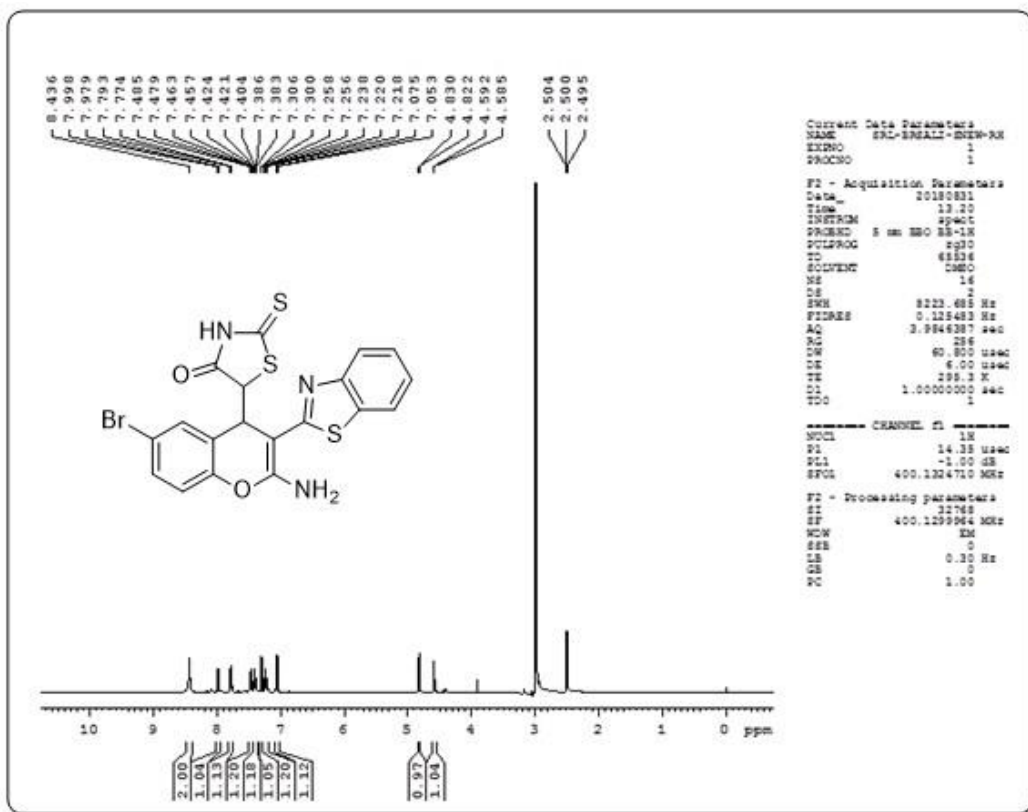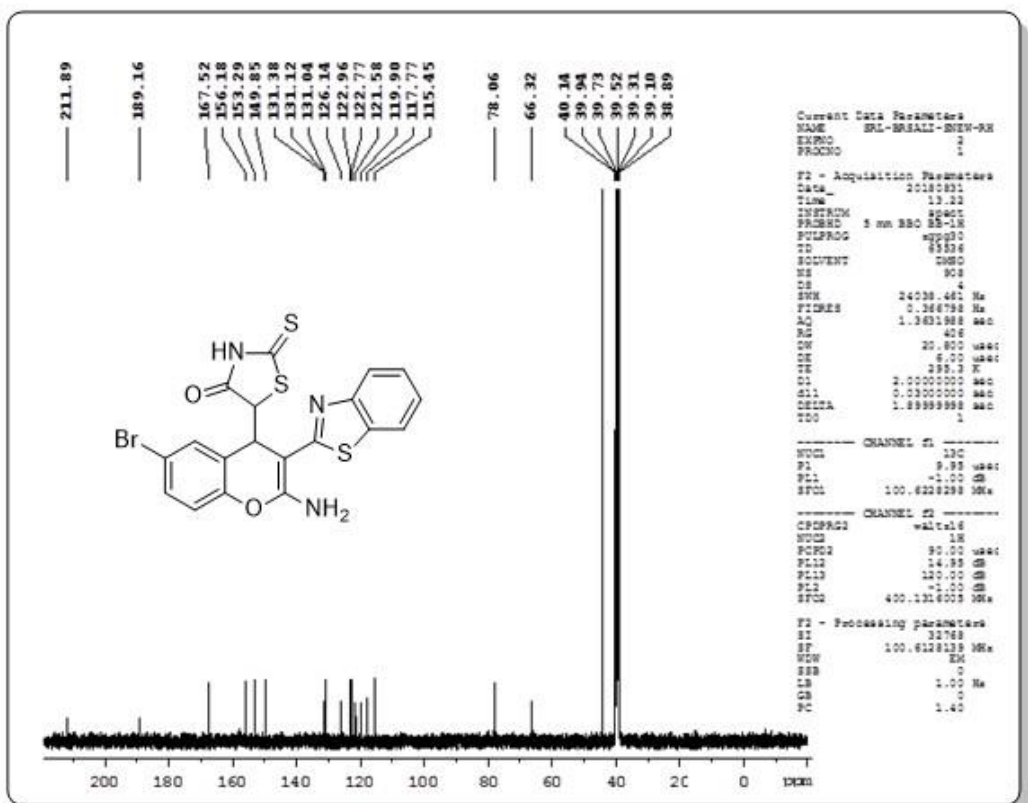

**Fig 10:**  $^1\text{H}$ ,  $^{13}\text{C}$  spectrum of 5-(2-amino-3-(benzo[d]thiazol-2-yl)-6-bromo-4H-chromen-4-yl)-2-thioxothiazolidin-4-one **4f**

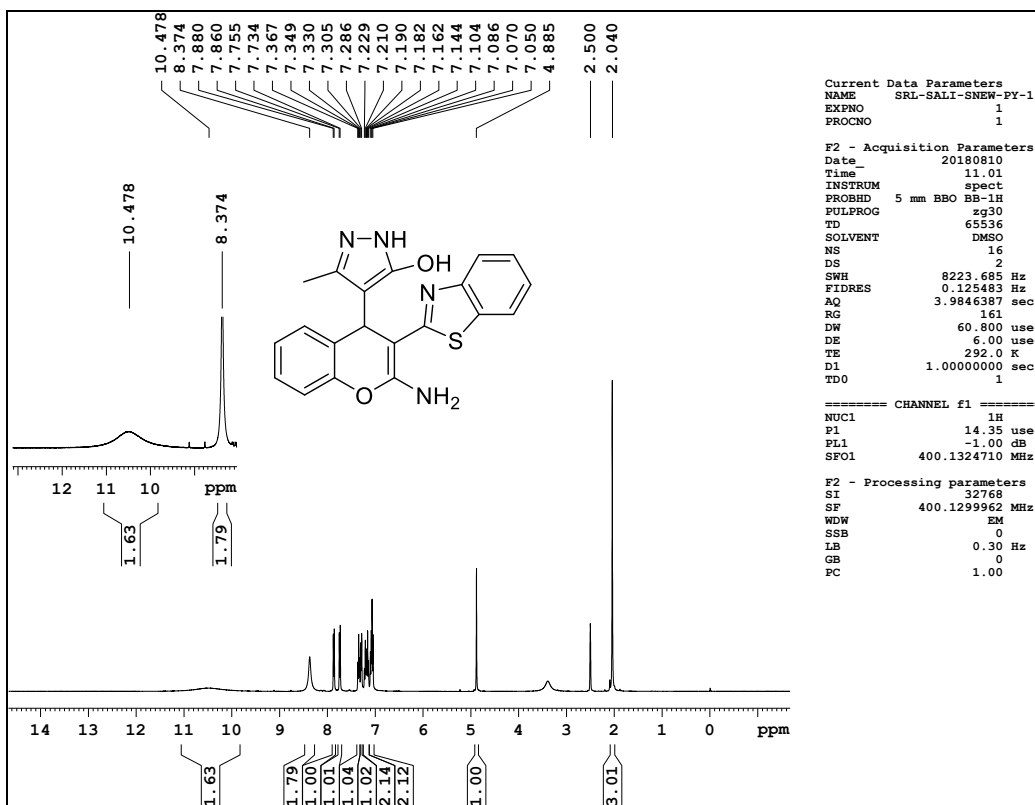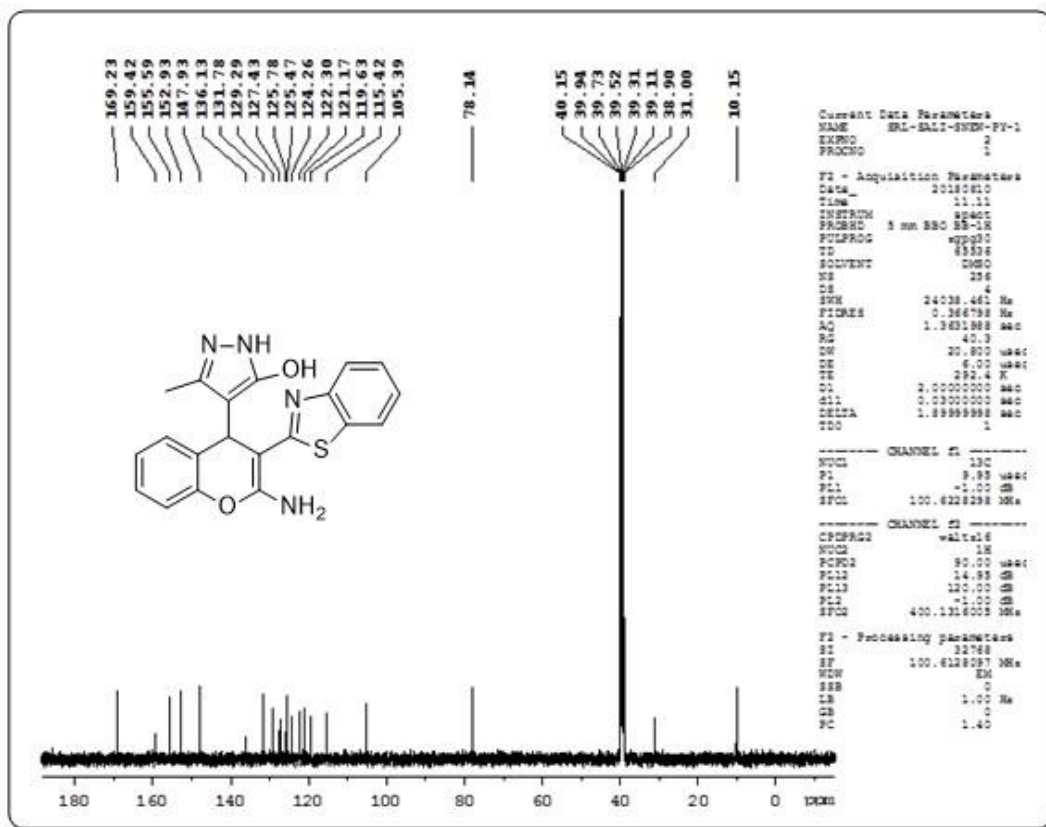

**Fig 11.**  $^1\text{H}$ ,  $^{13}\text{C}$  spectrum of 4-(2-amino-3-(benzo[d]thiazol-2-yl)-4H-chromen-4-yl)-3-methyl-1H-pyrazol-5-ol **4g**

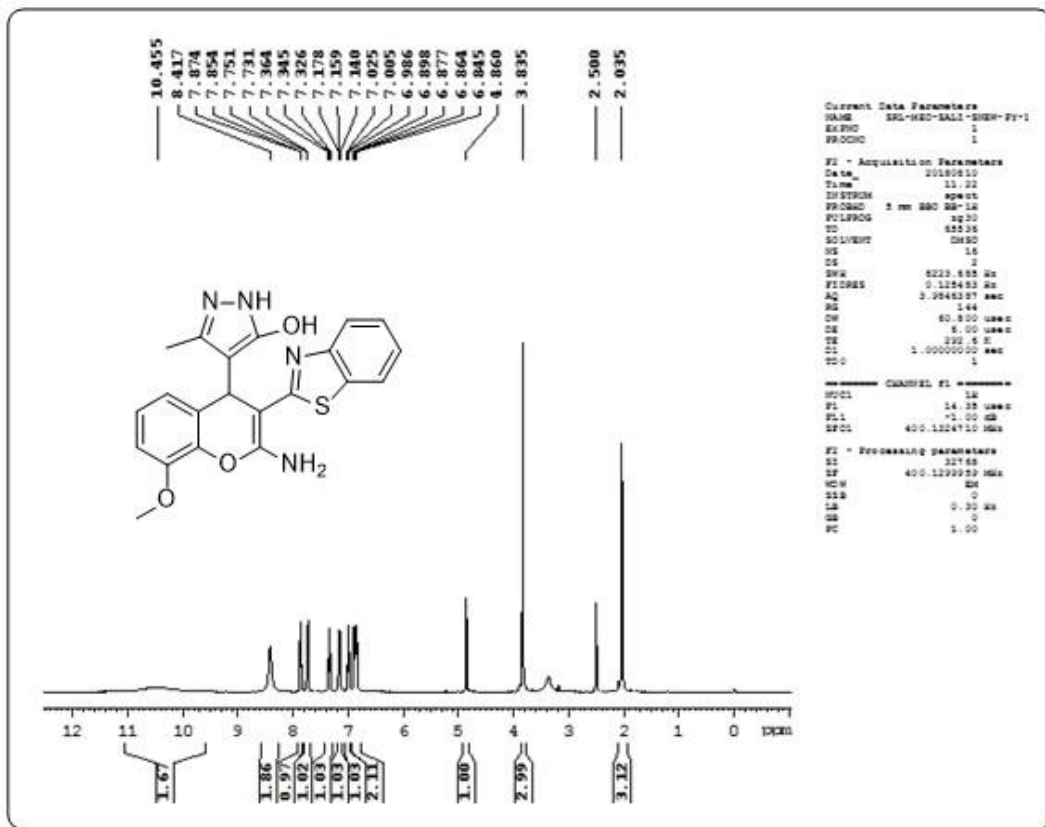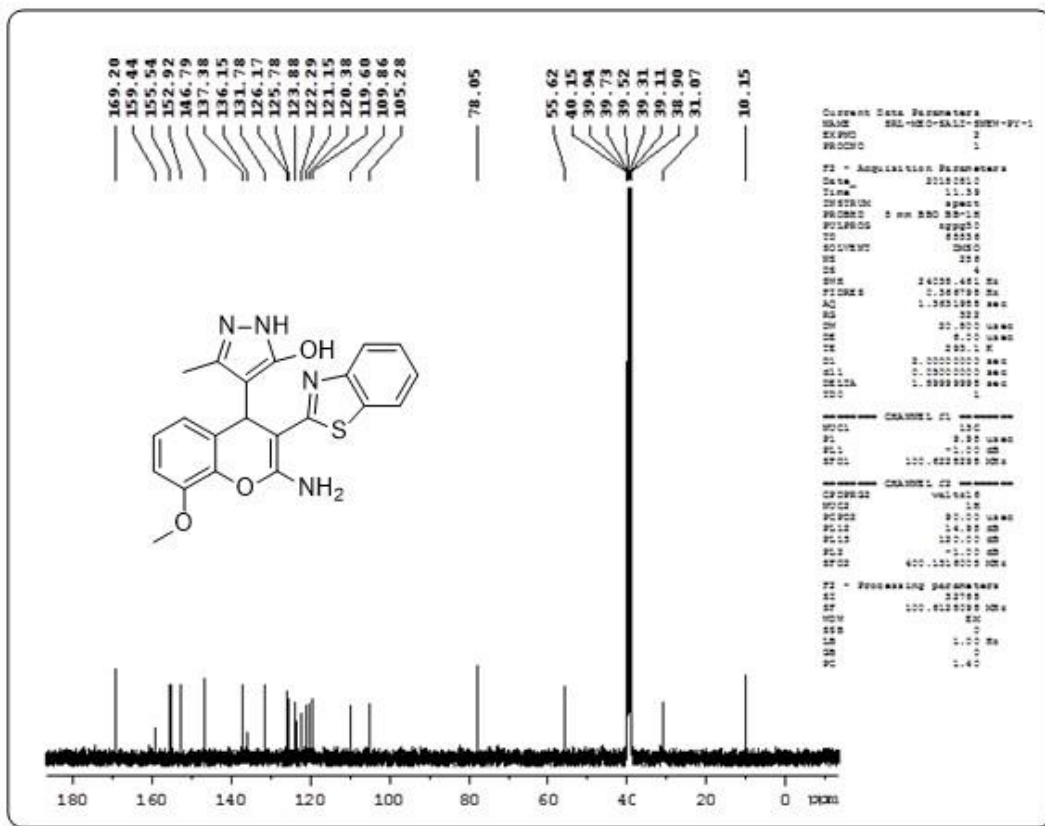

**Fig 12:**  $^1\text{H}$ ,  $^{13}\text{C}$  spectrum of 4-(2-amino-3-(benzo[d]thiazol-2-yl)-8-methoxy-4H-chromen-4-yl)-3-methyl-1H-pyrazol-5-ol **4h**

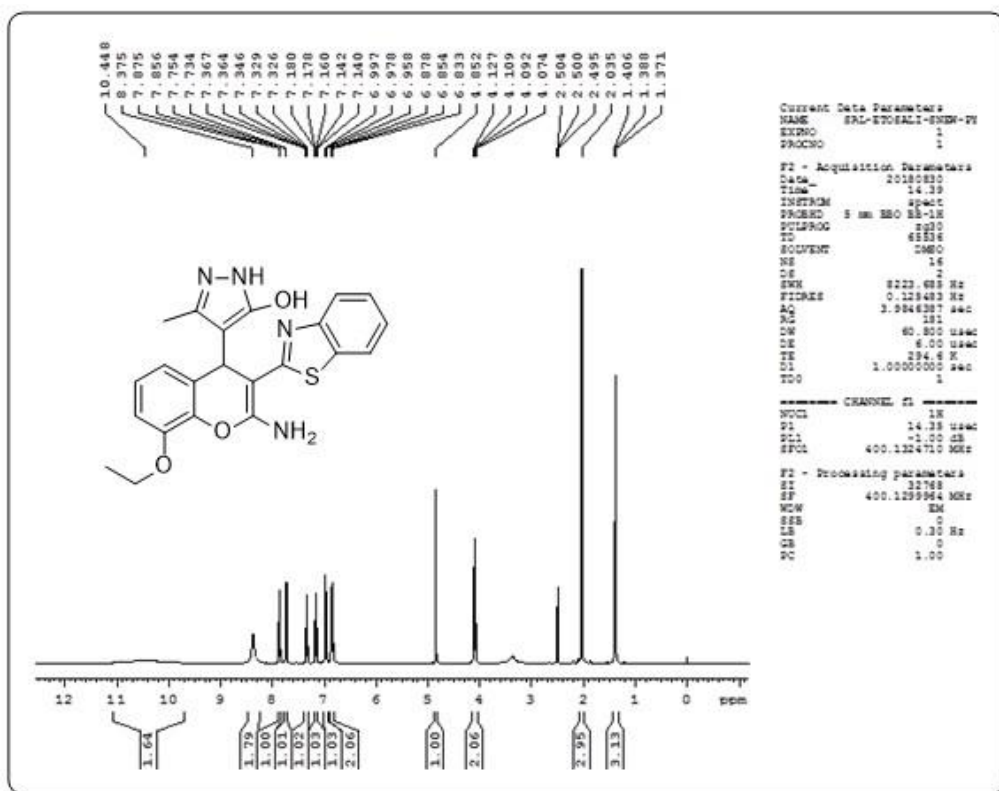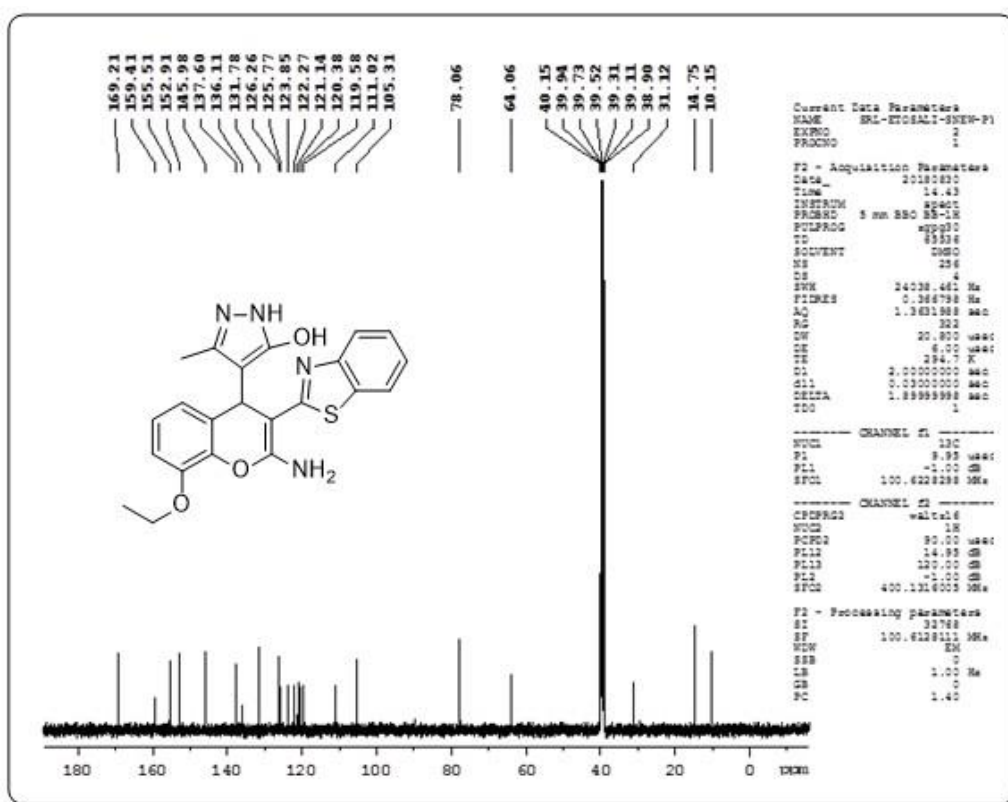

**Fig 13:**  $^1\text{H}$ ,  $^{13}\text{C}$  spectrum of 4-(2-amino-3-(benzo[d]thiazol-2-yl)-8-ethoxy-4H-chromen-4-yl)-3-methyl-1H-pyrazol-5-ol **4i**

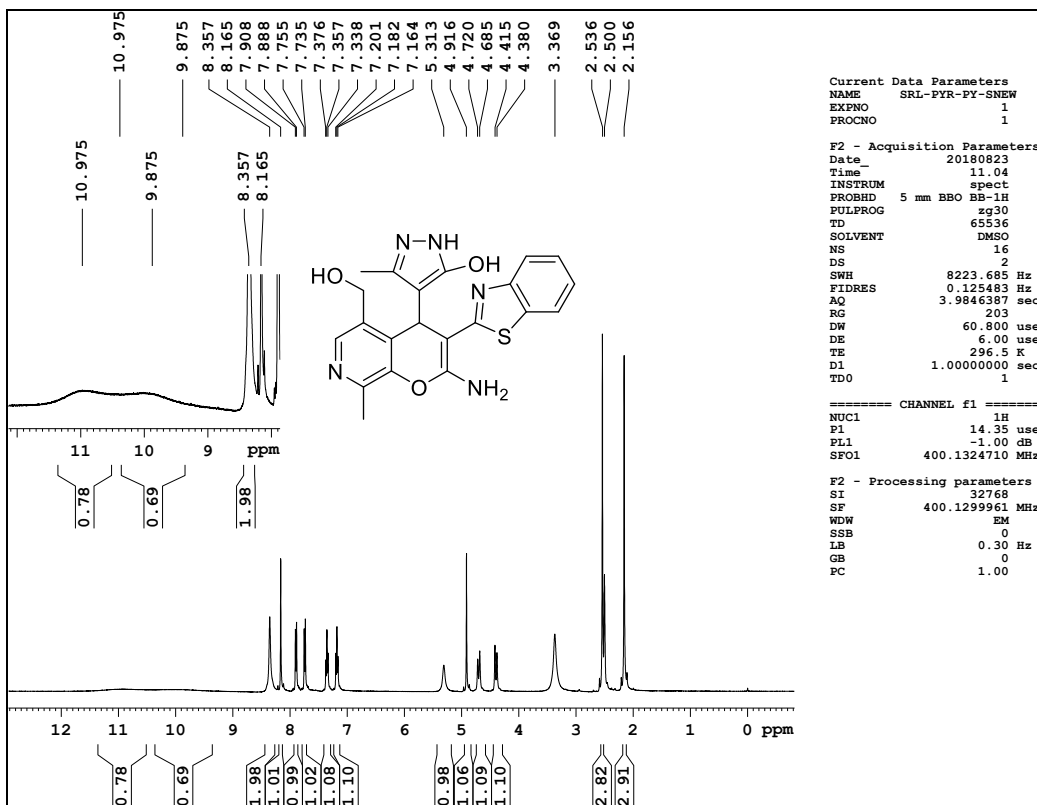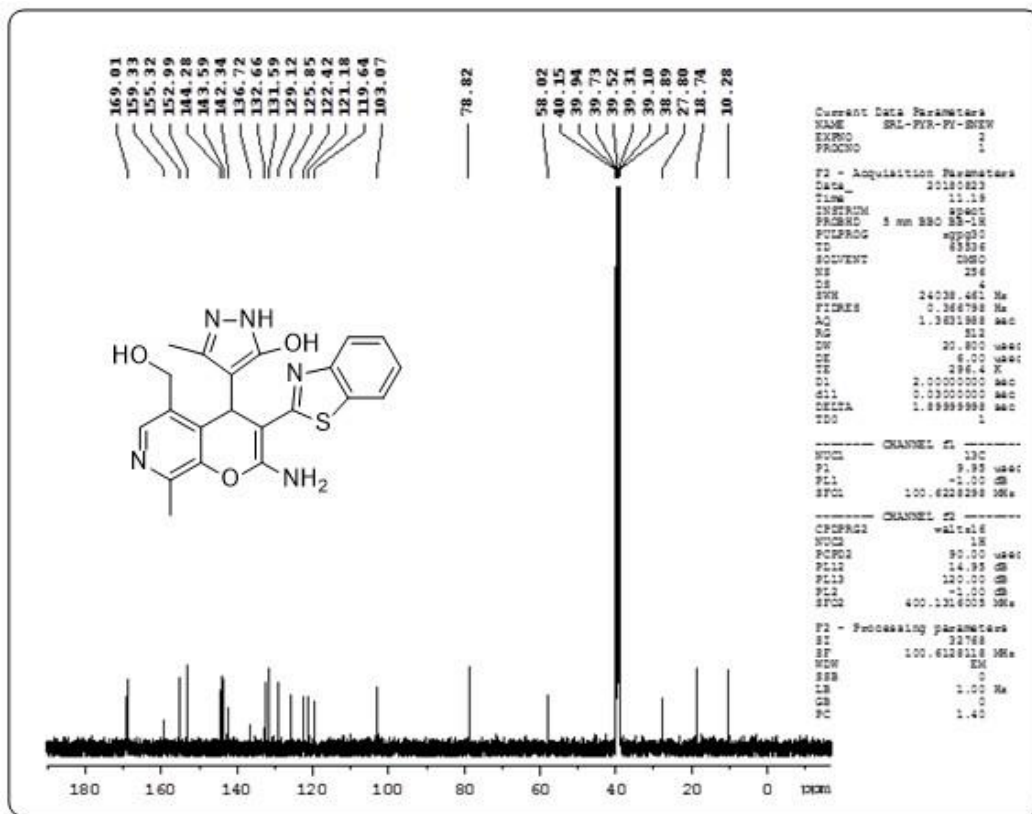

**Fig 14:**  $^1\text{H}$ ,  $^{13}\text{C}$  spectrum of 4-(2-amino-3-(benzo[d]thiazol-2-yl)-5-(hydroxymethyl)-8-methyl-4H-pyrano[2,3-c]pyridin-4-yl)-3-methyl-1H-pyrazol-5-ol **4j**

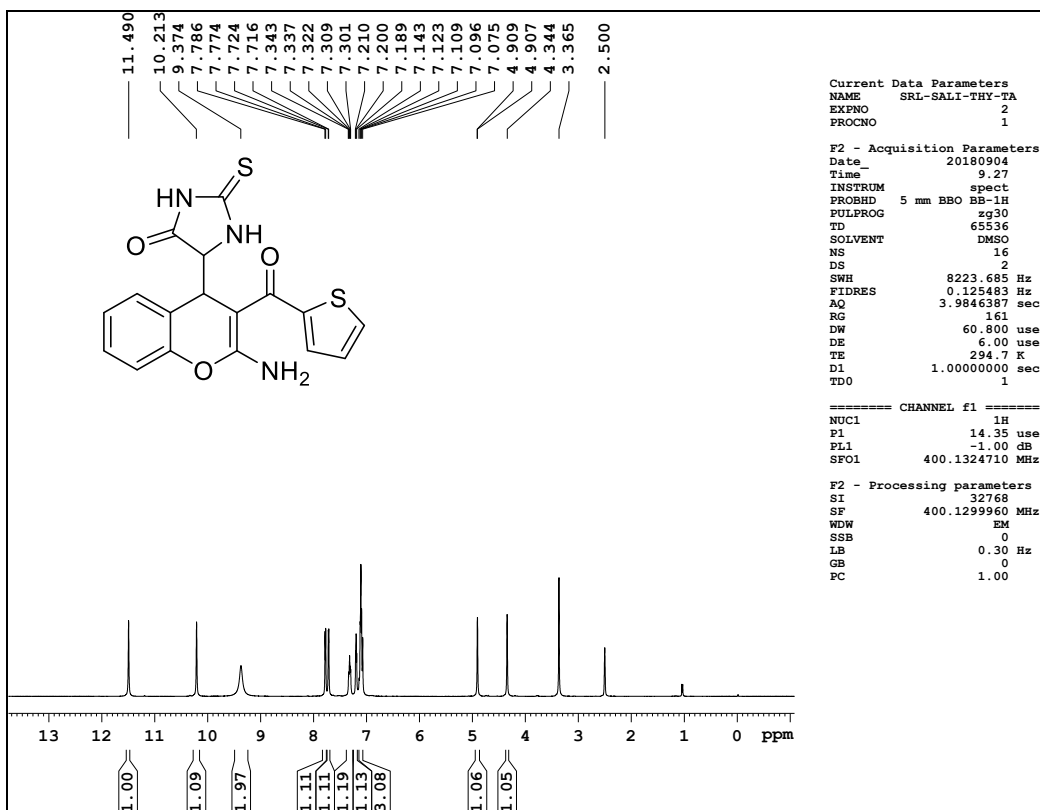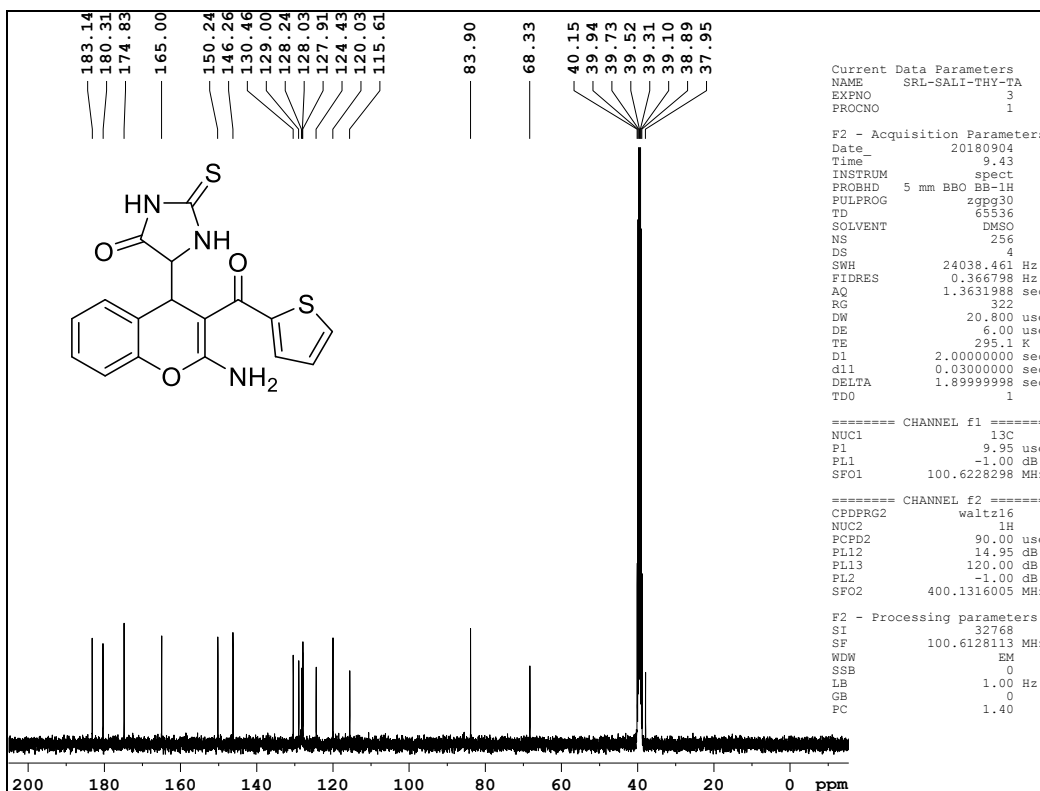

**Fig 15:**  $^1\text{H}$ ,  $^{13}\text{C}$  spectrum of 5-(2-amino-3-(thiophene-2-carbonyl)-4H-chromen-4-yl)-2-thioxoimidazolidin-4-one **7a**

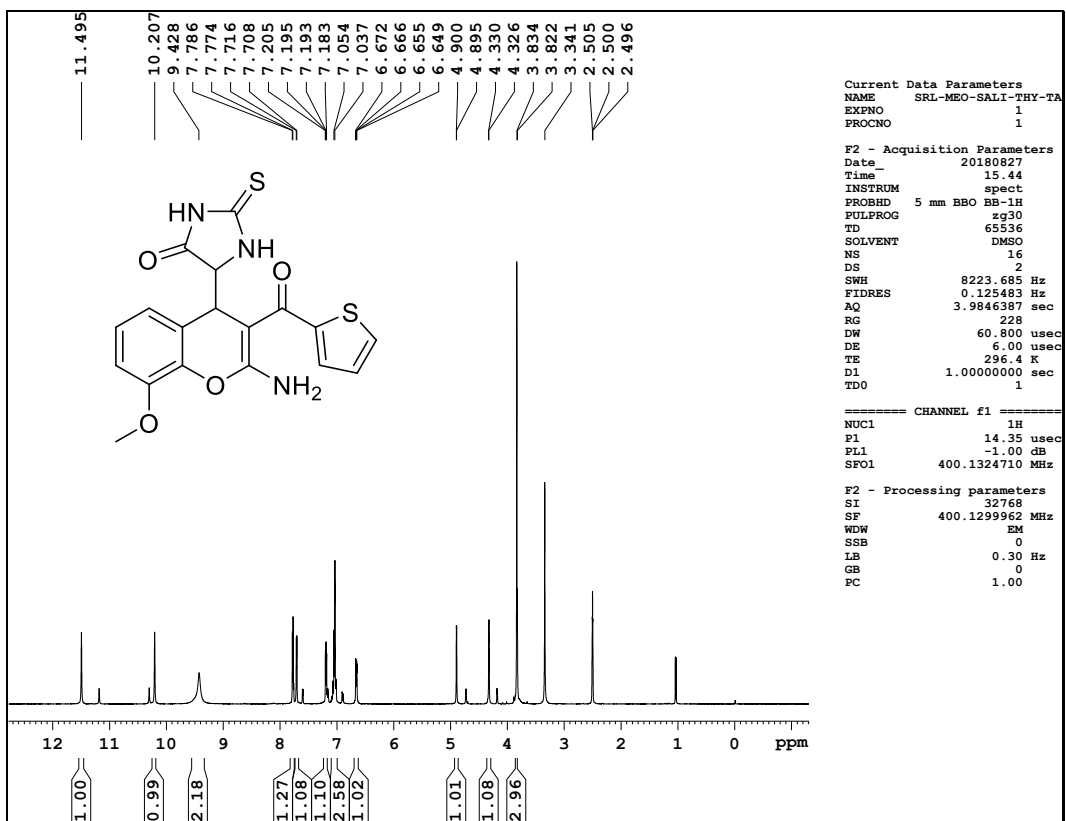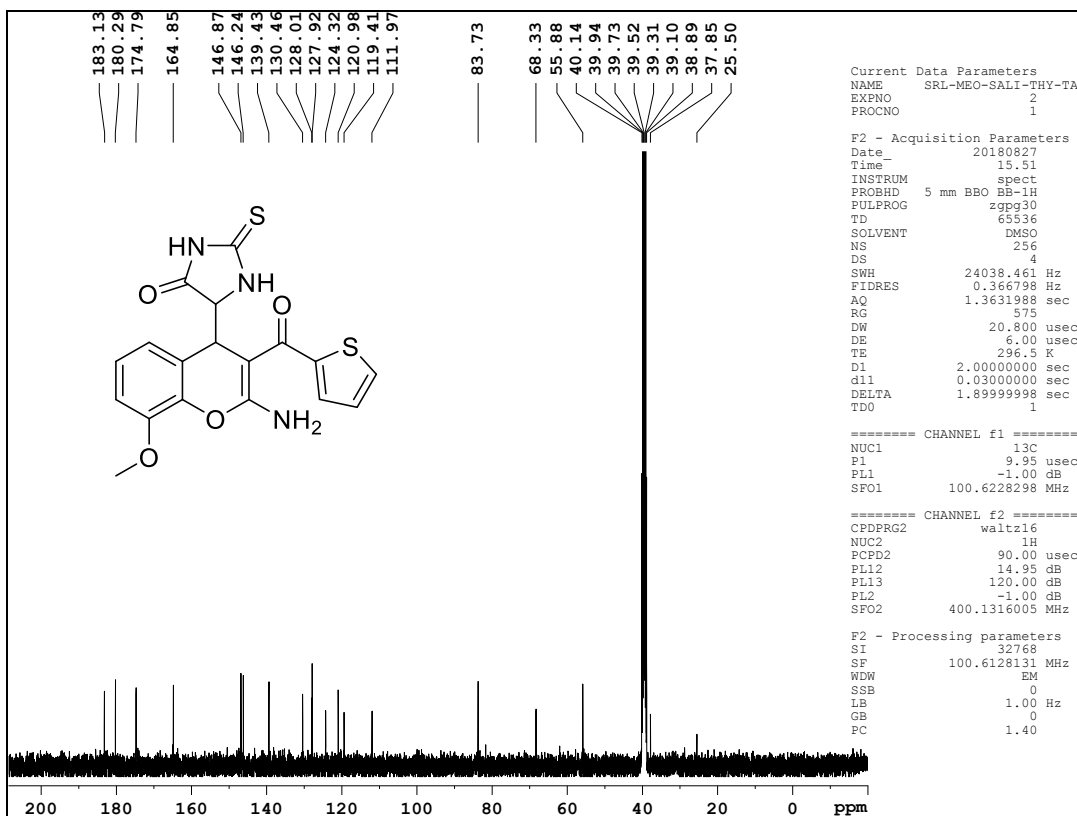

**Fig 16:**  $^1\text{H}$ ,  $^{13}\text{C}$  spectrum of 5-(2-amino-8-methoxy-3-(thiophene-2-carbonyl)-4H-chromen-4-yl)-2-thioxoimidazolidin-4-one **7b**

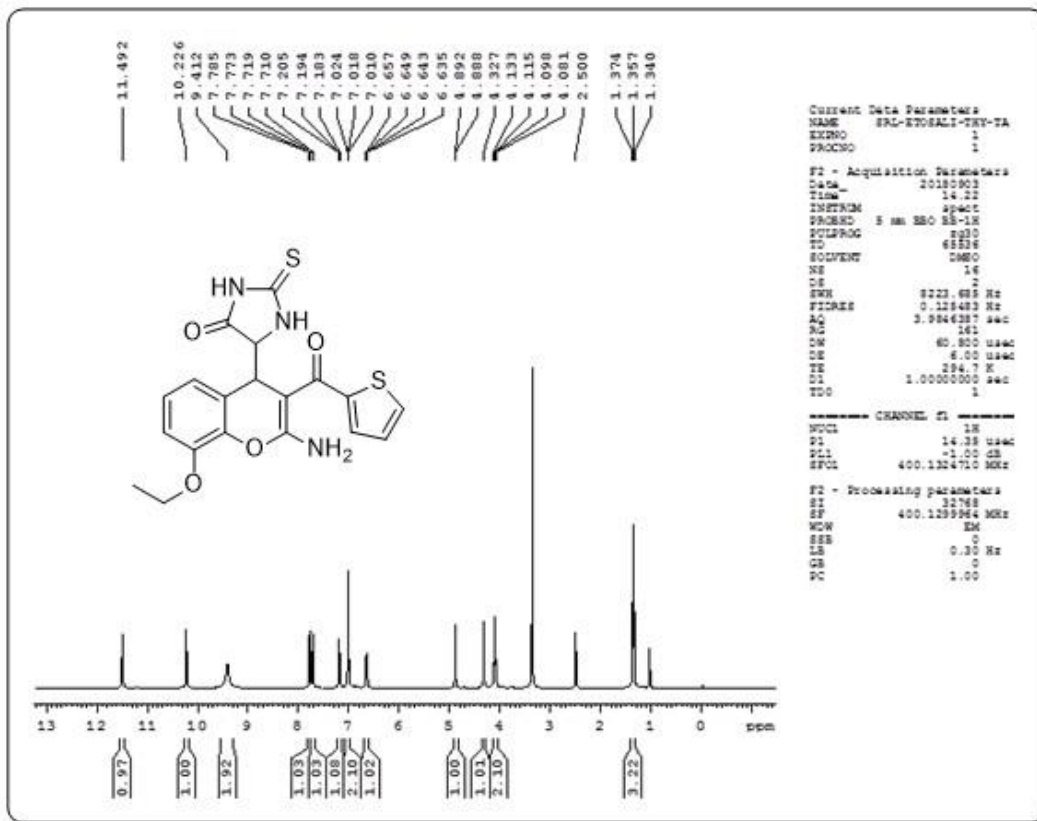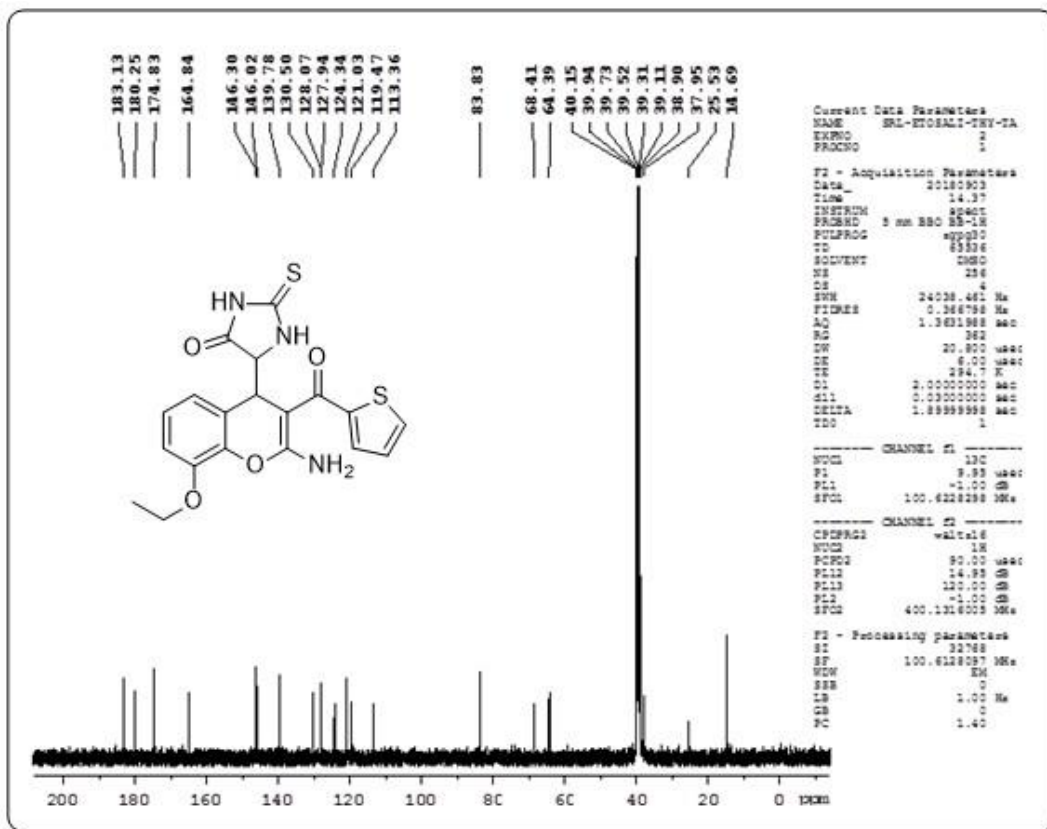

**Fig 17:** <sup>1</sup>H, <sup>13</sup>C spectrum of 5-(2-amino-8-ethoxy-3-(thiophene-2-carbonyl)-4H-chromen-4-yl)-2-thioxoimidazolidin-4-one **7c**



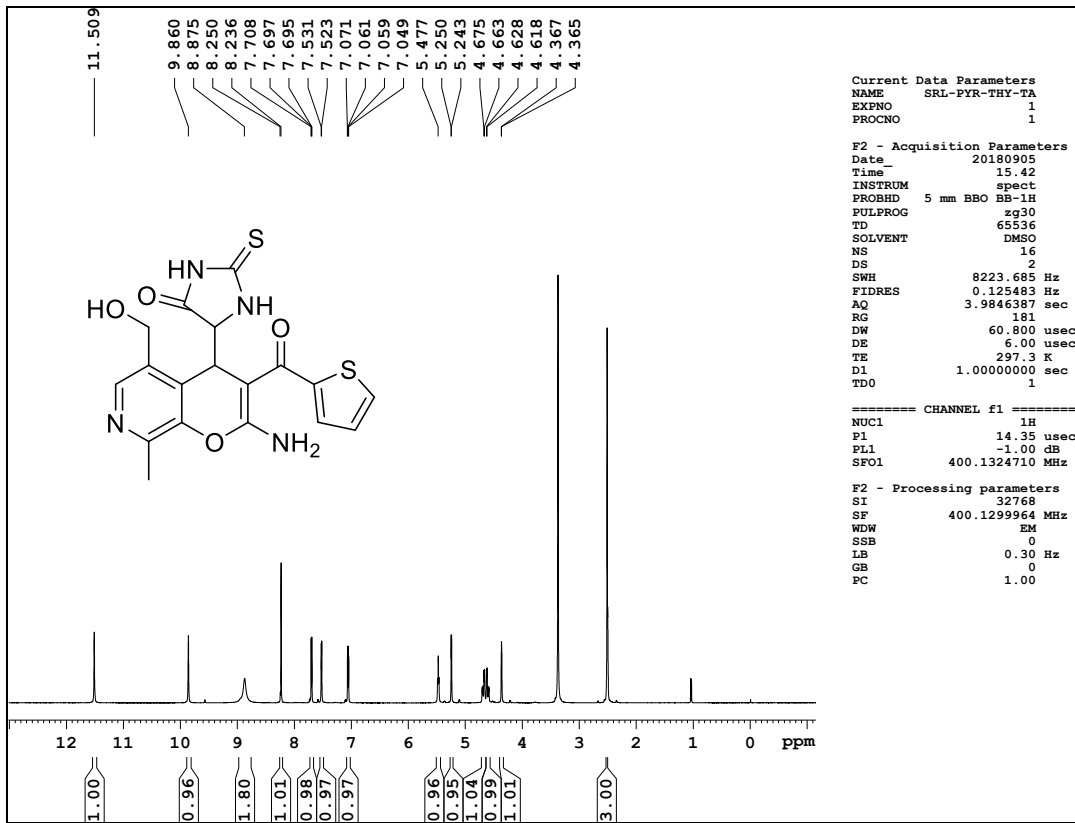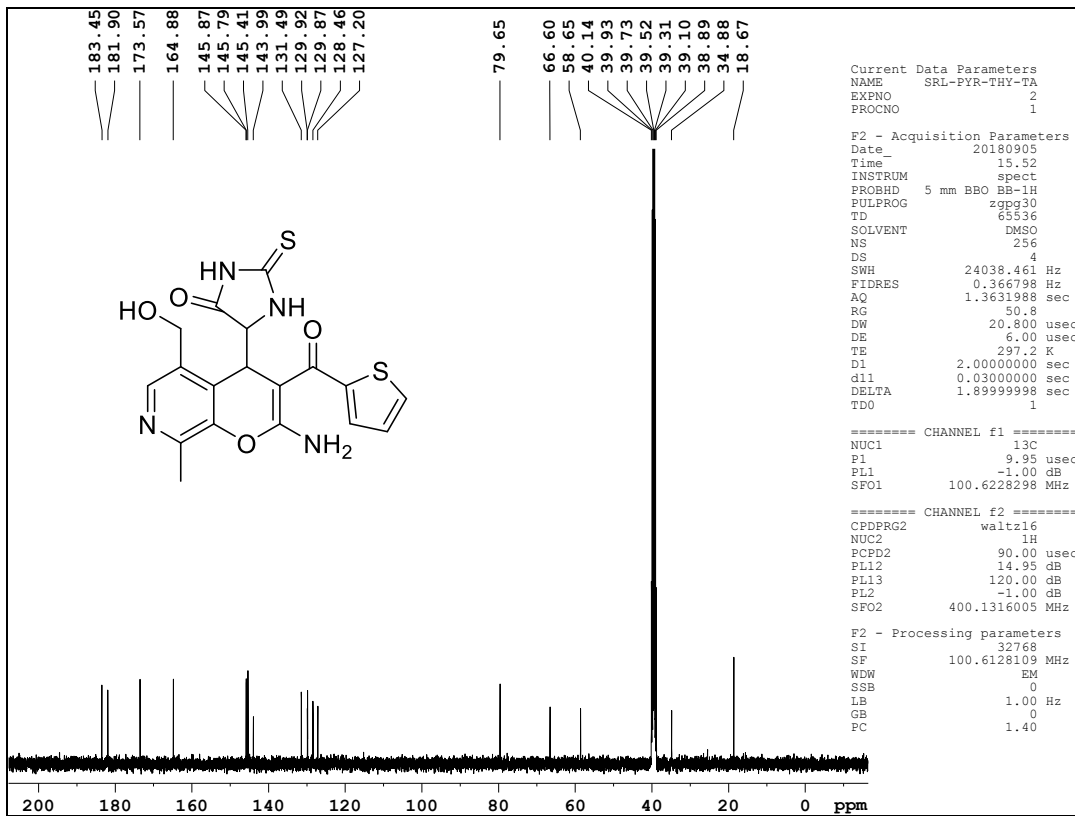

**Fig 18:**  $^1\text{H}$ ,  $^{13}\text{C}$  spectrum of 5-(2-amino-5-(hydroxymethyl)-8-methyl-3-(thiophene-2-carbonyl)-4H-pyrano[2,3-c]pyridin-4-yl)-2-thioxoimidazolidin-4-one **7d**

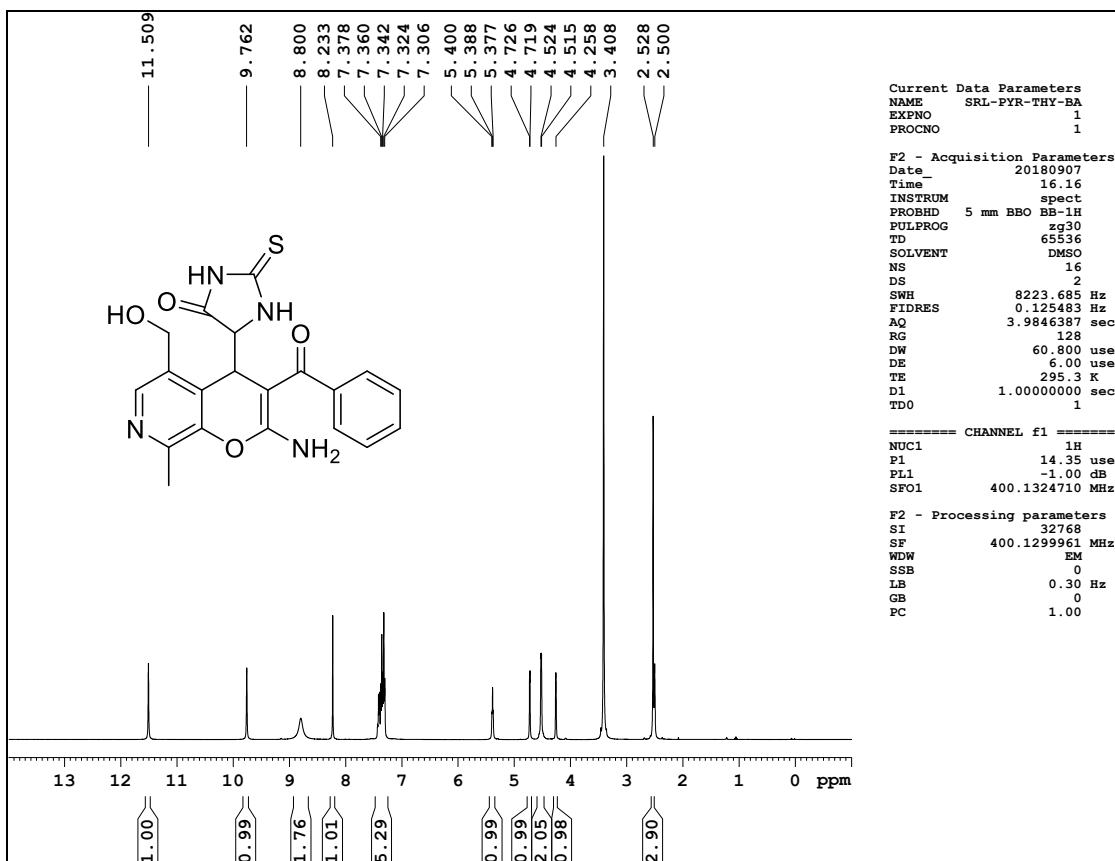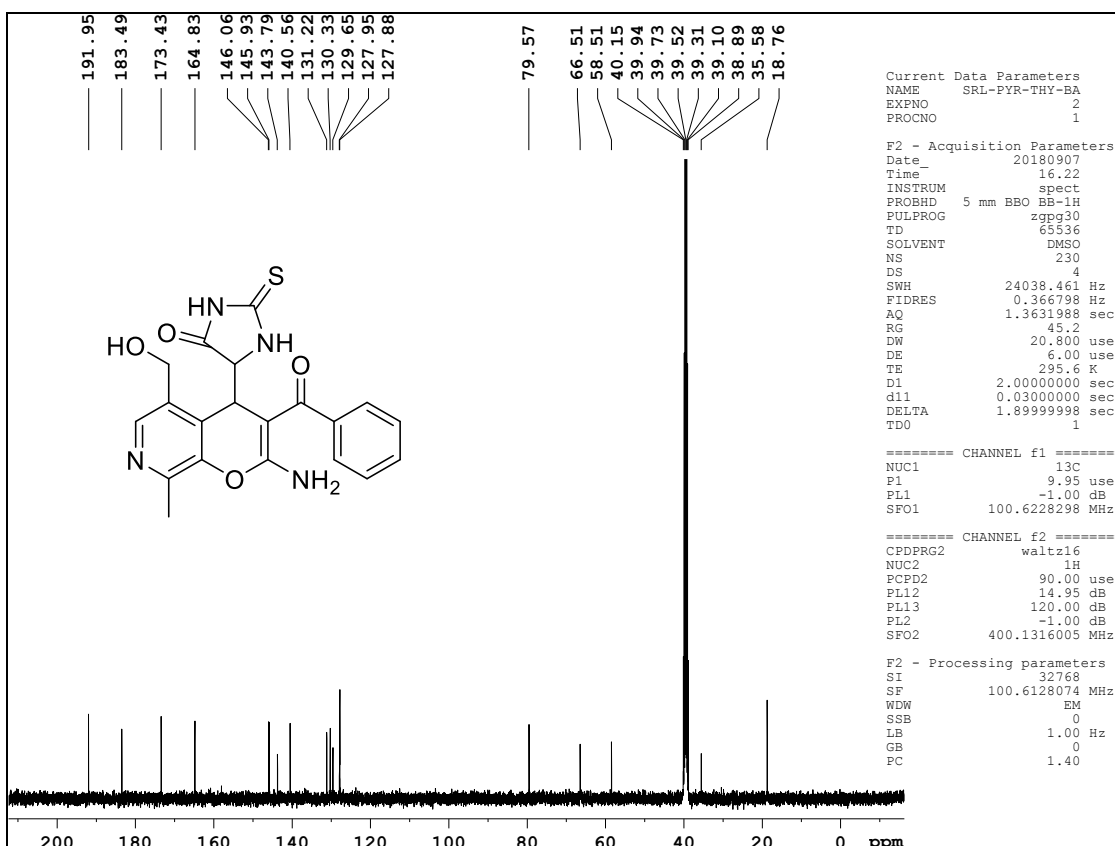

**Fig 19:** <sup>1</sup>H, <sup>13</sup>C spectrum of 5-(2-amino-3-benzoyl-5-(hydroxymethyl)-8-methyl-4H-pyrano[2,3-c]pyridin-4-yl)-2-thioxoimidazolidin-4-one **7e**

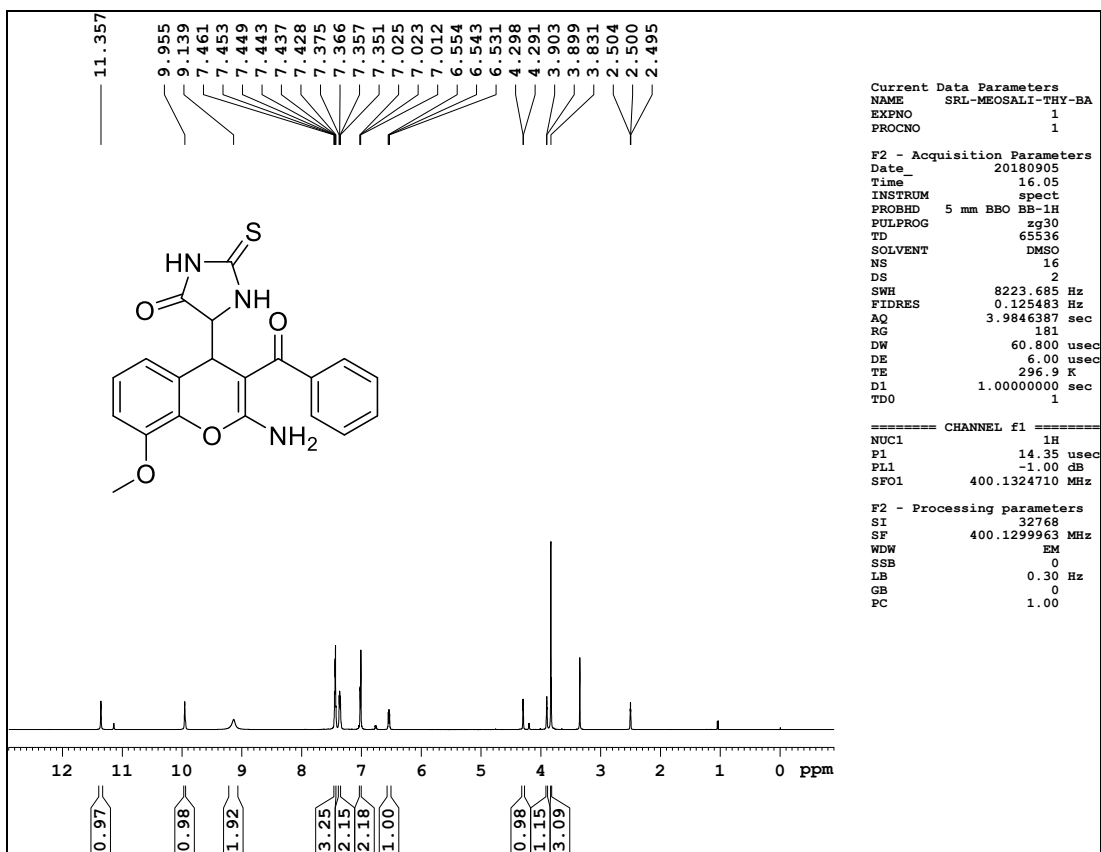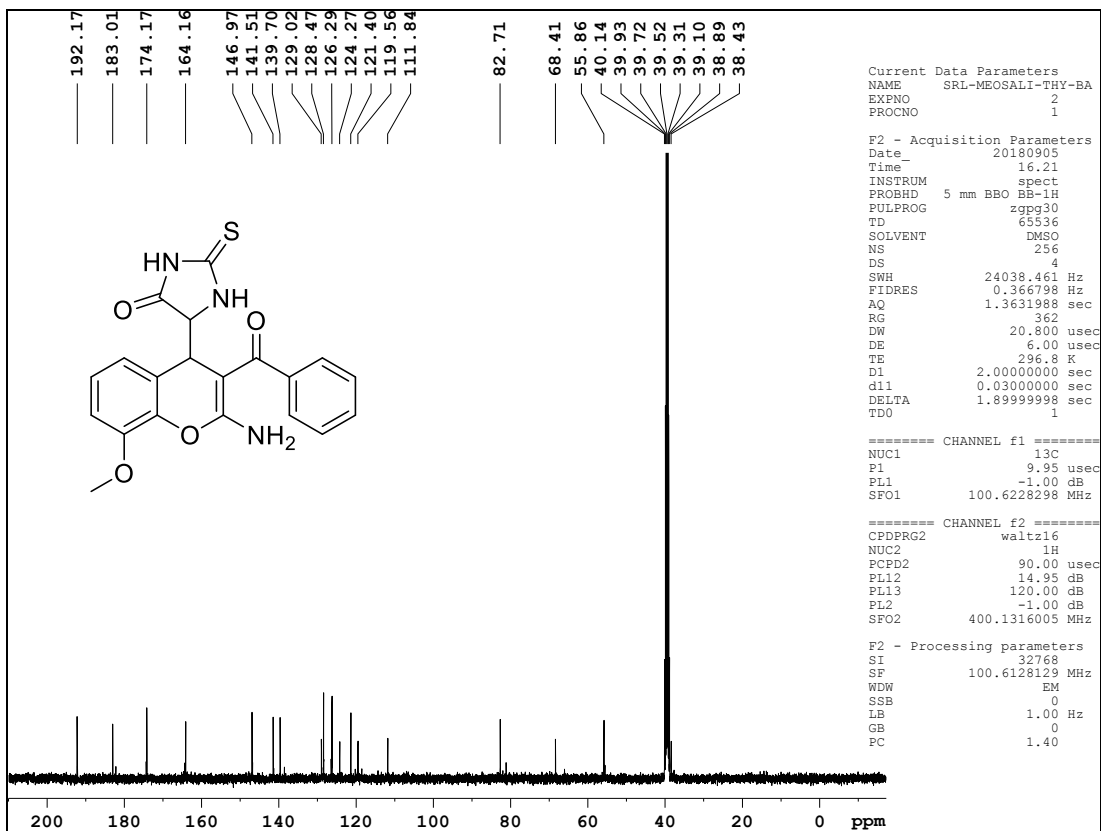

**Fig 20:** <sup>1</sup>H, <sup>13</sup>C spectrum of 5-(2-amino-3-benzoyl-8-methoxy-4H-chromen-4-yl)-2-thioxoimidazolidin-4-one **7f**

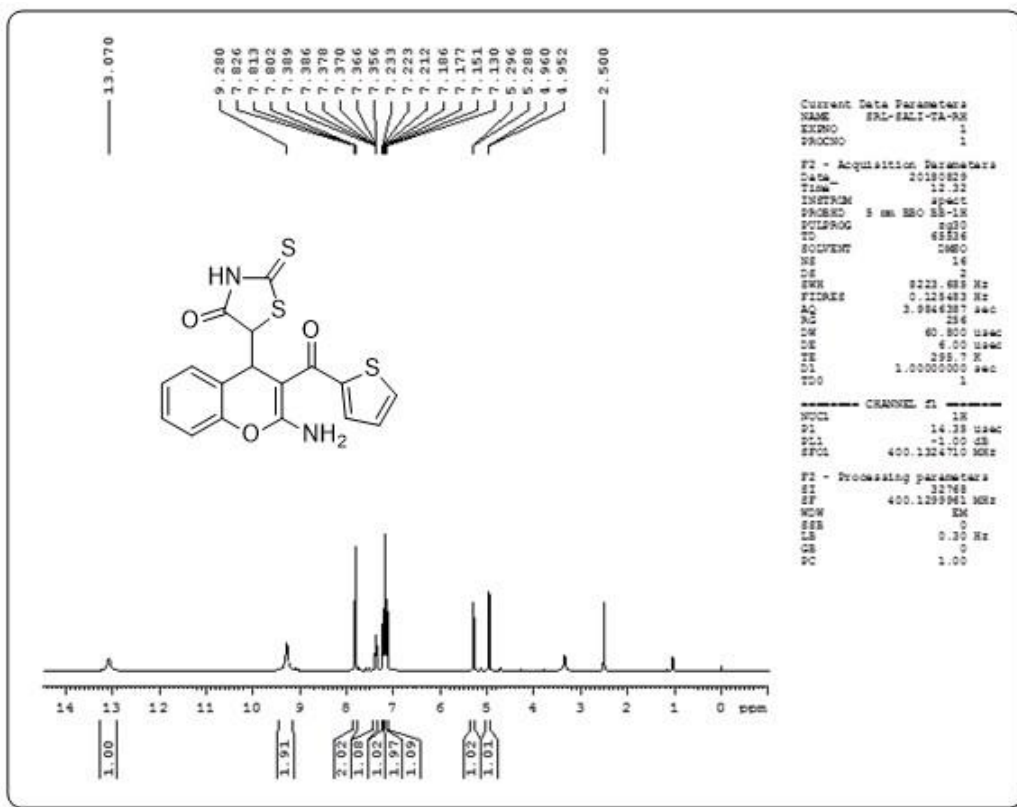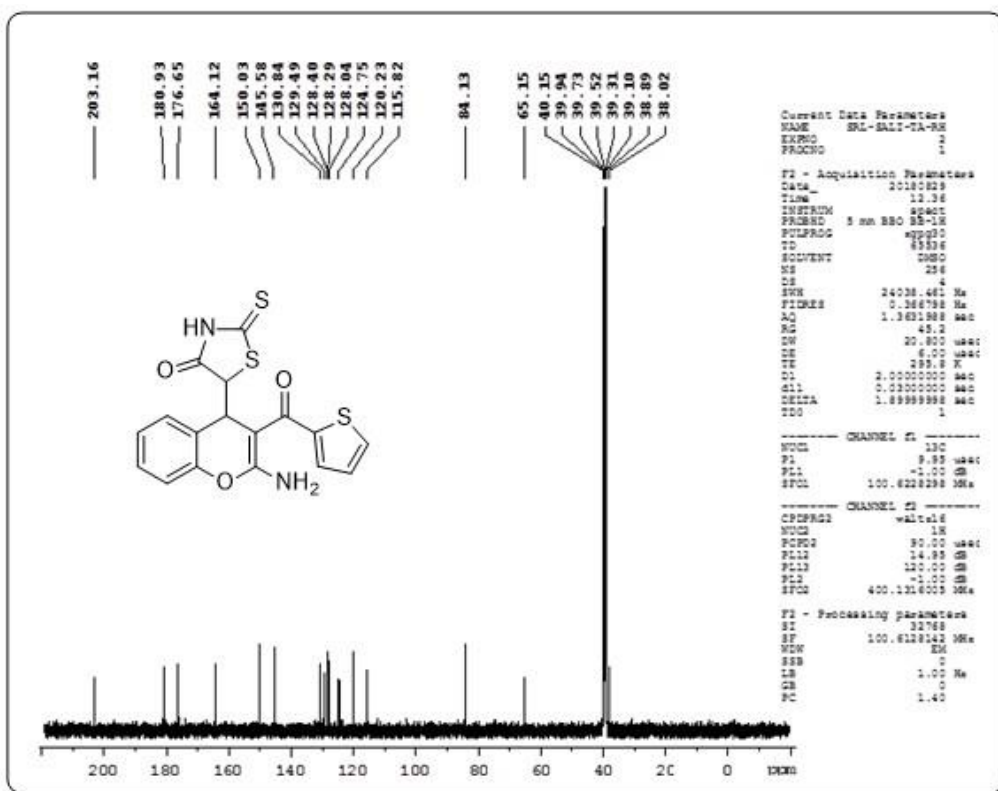

**Fig 21:** <sup>1</sup>H, <sup>13</sup>C spectrum of 5-(2-amino-3-(thiophene-2-carbonyl)-4H-chromen-4-yl)-2-thioxothiazolidin-4-one **7g**

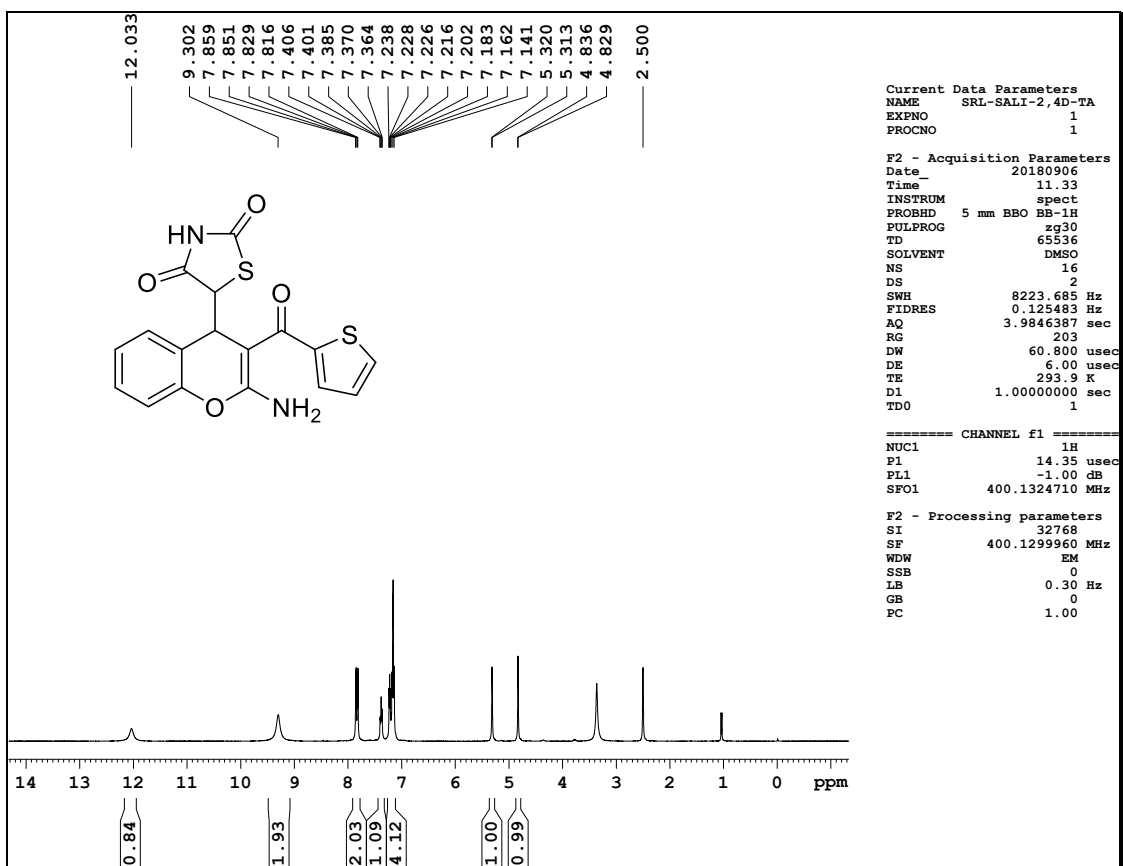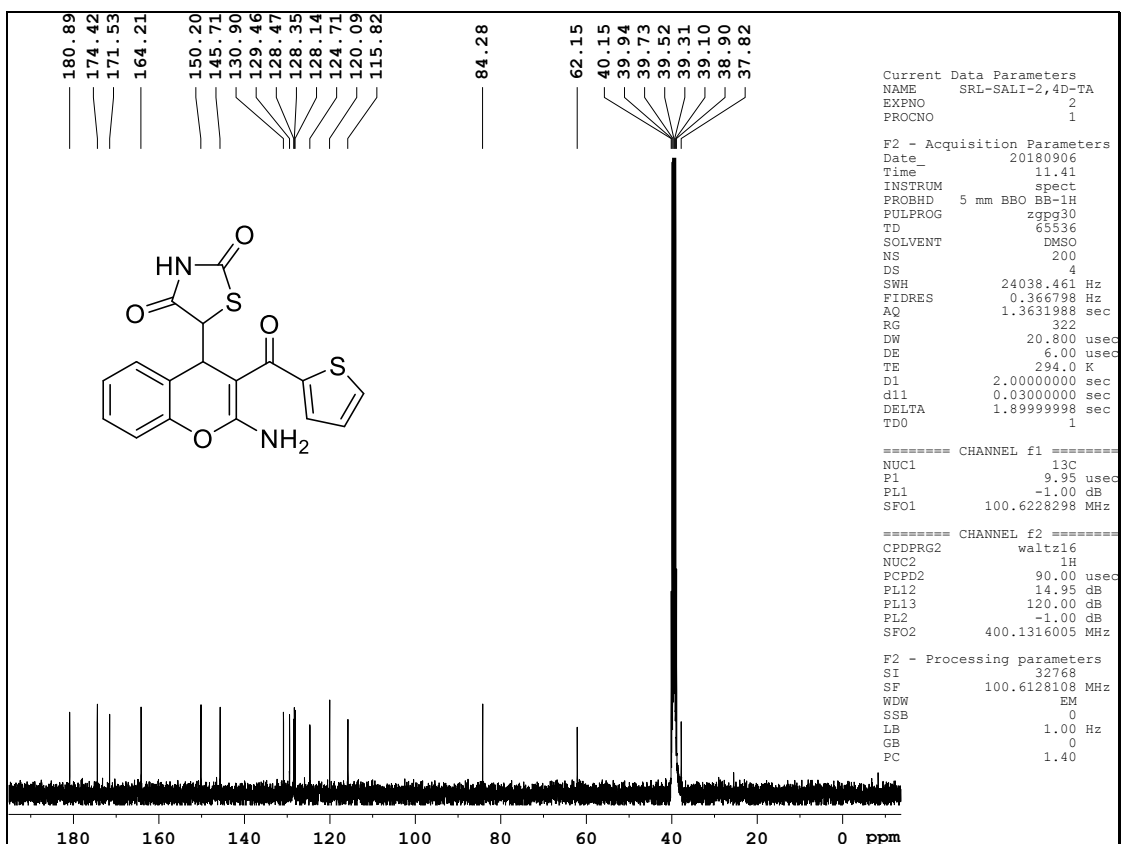

**Fig 22:** <sup>1</sup>H, <sup>13</sup>C spectrum of 5-(2-amino-3-(thiophene-2-carbonyl)-4H-chromen-4-yl)thiazolidine-2,4-dione **7h**

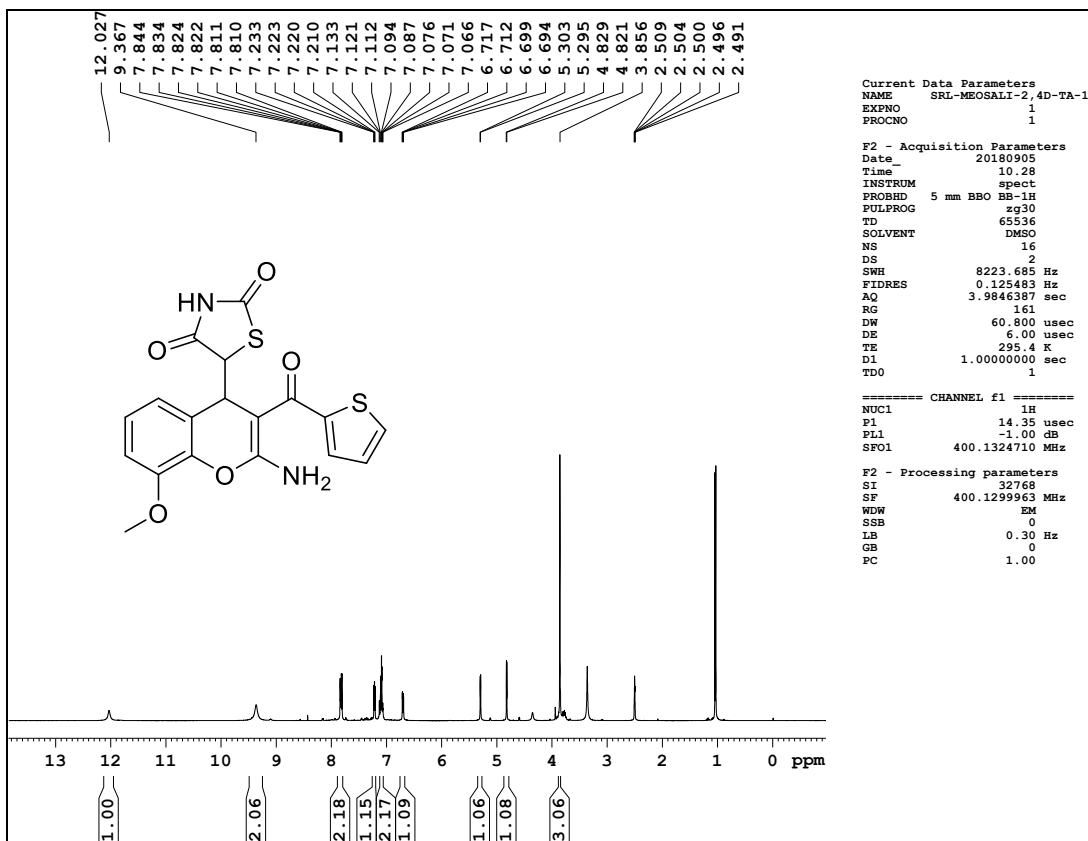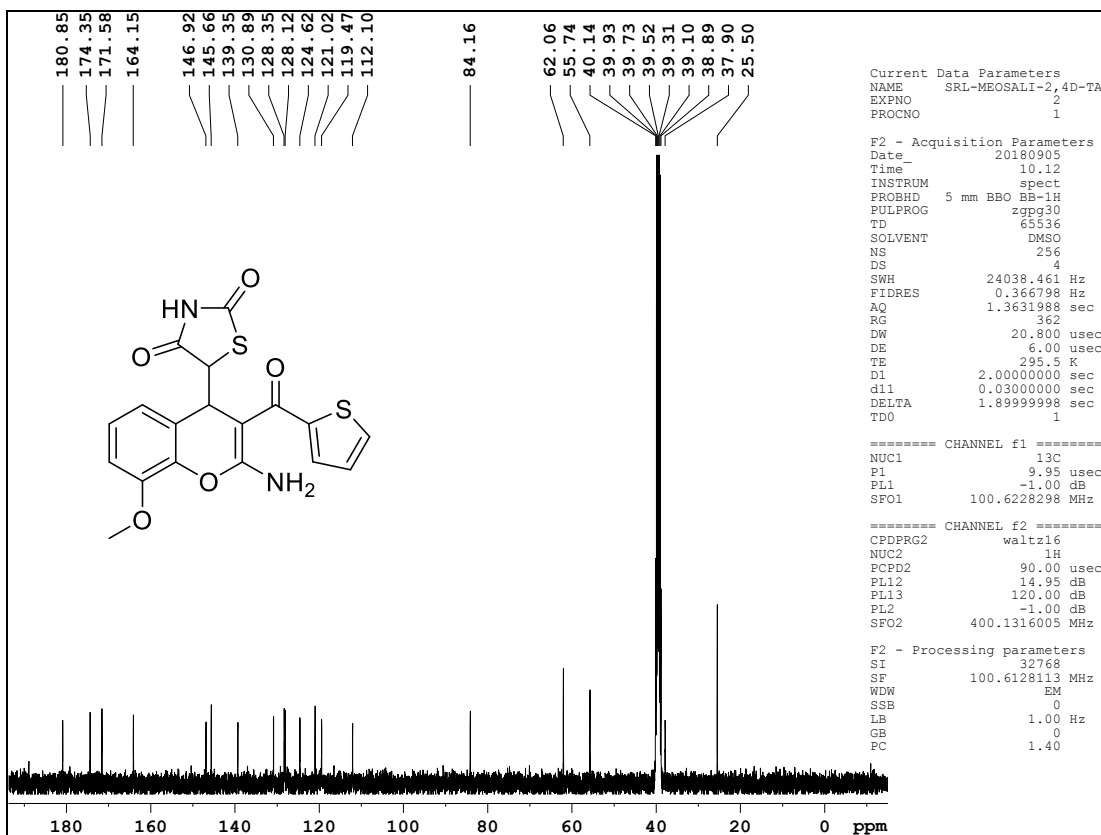

**Fig 23:**  $^1\text{H}$ ,  $^{13}\text{C}$  spectrum of 5-(2-amino-8-methoxy-3-(thiophene-2-carbonyl)-4H-chromen-4-yl)thiazolidine-2,4-dione **7i**

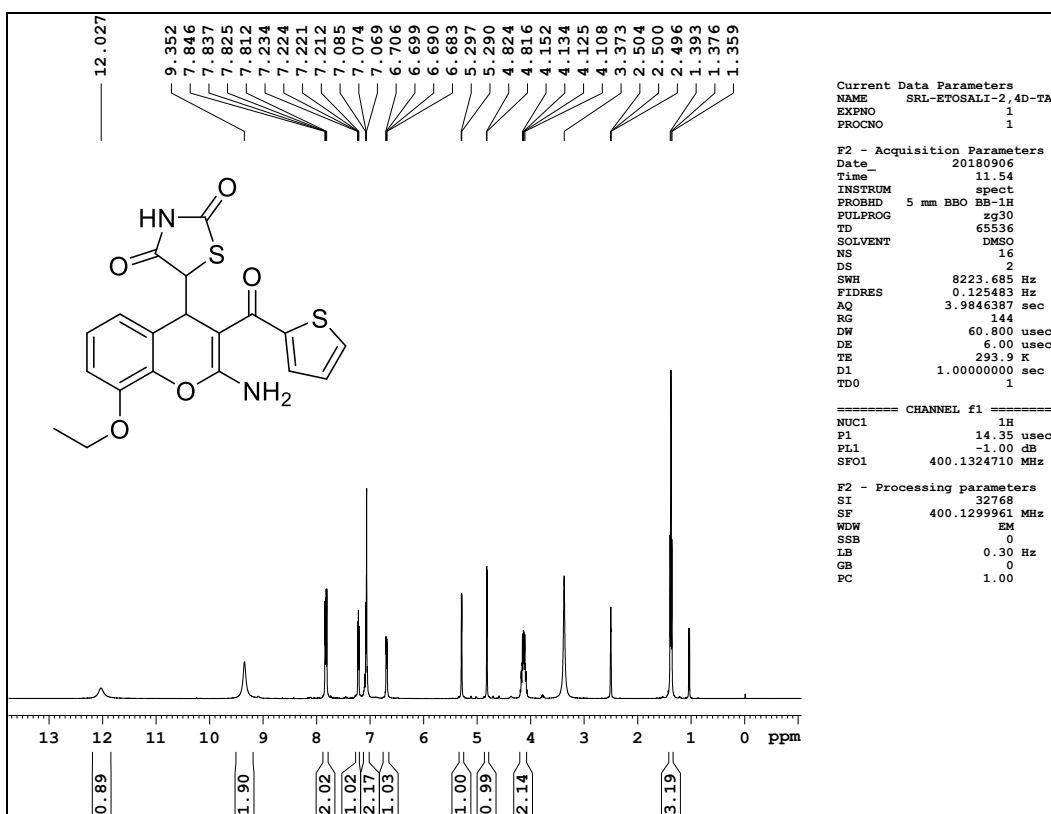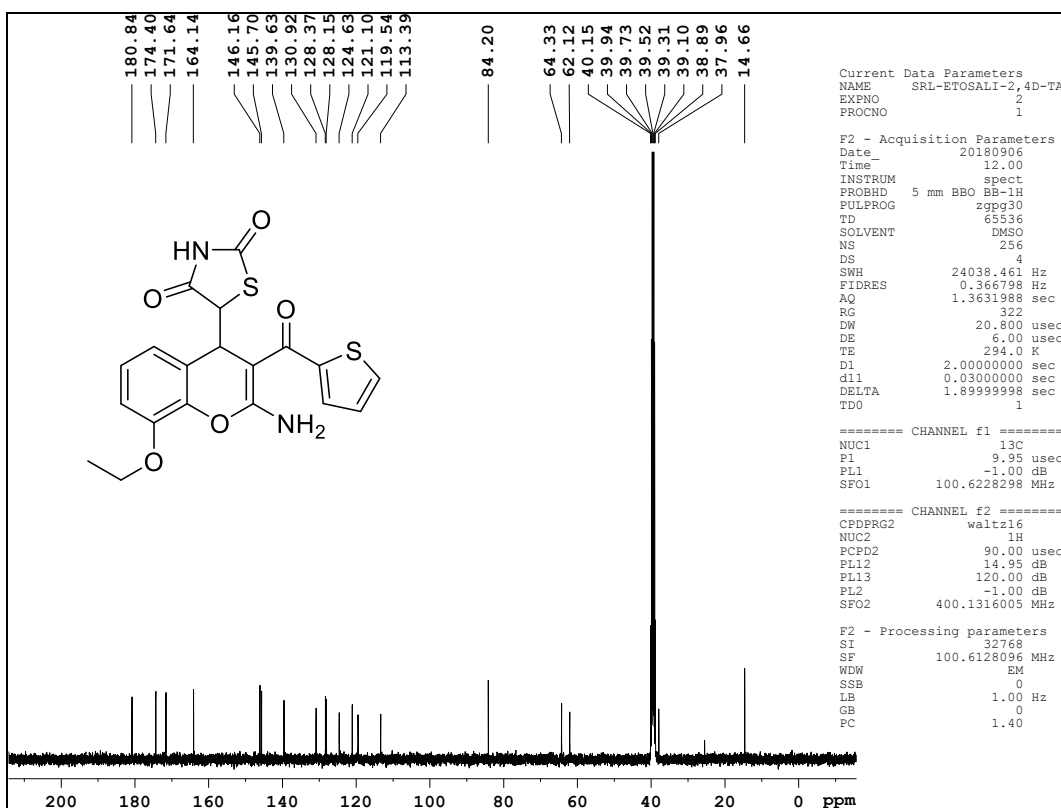

**Fig 24:**  $^1\text{H}$ ,  $^{13}\text{C}$  spectrum of 5-(2-amino-8-ethoxy-3-(thiophene-2-carbonyl)-4H-chromen-4-yl)thiazolidine-2,4-dione **7j**

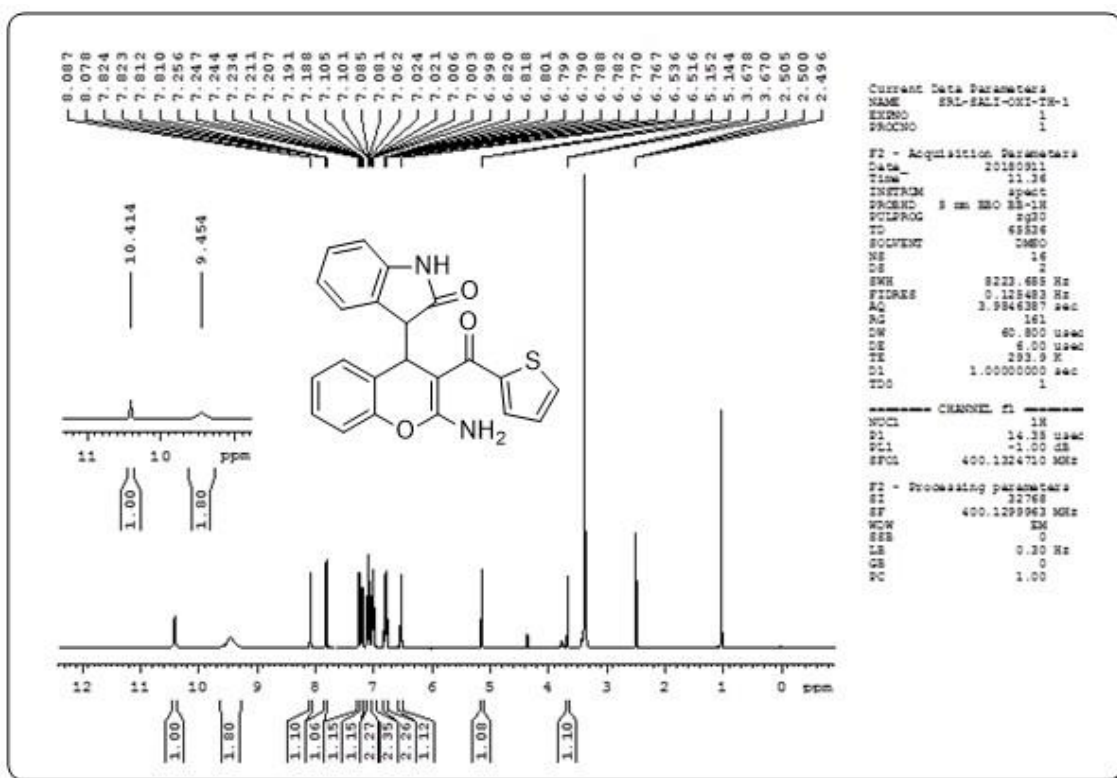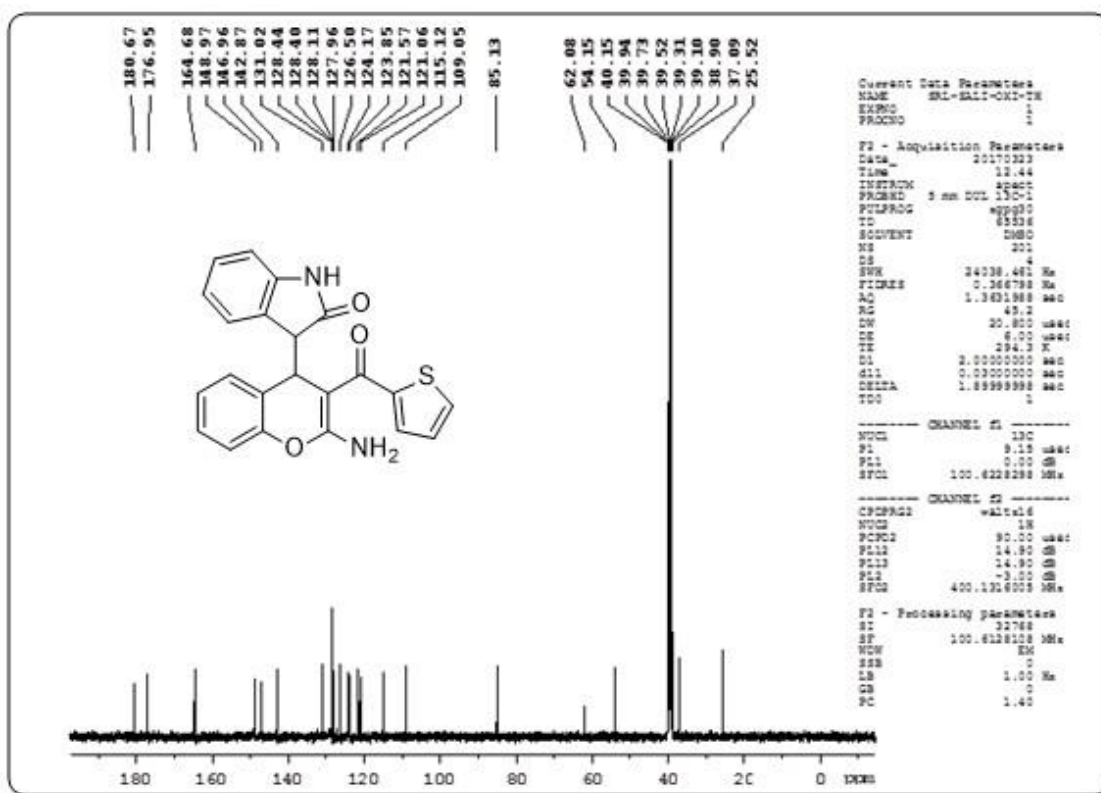

**Fig 25:**  $^1\text{H}$ ,  $^{13}\text{C}$  spectrum of 3-(2-amino-3-(thiophene-2-carbonyl)-4H-chromen-4-yl)indolin-2-one **7k**



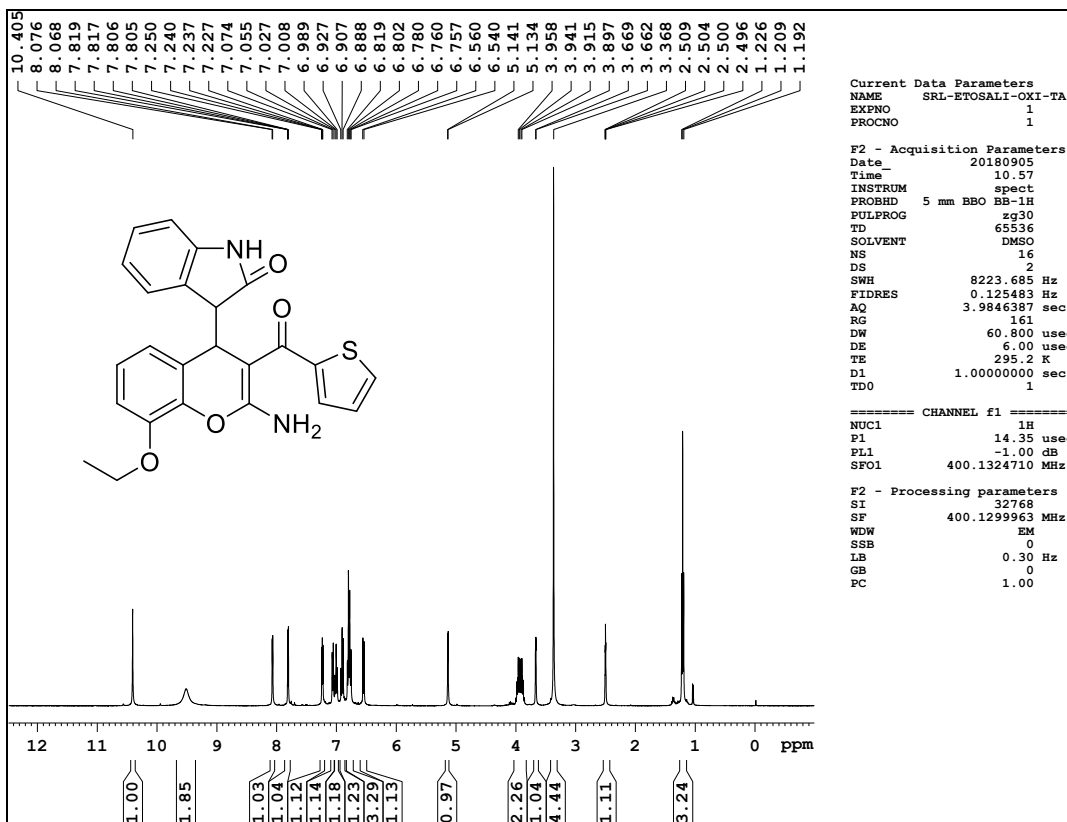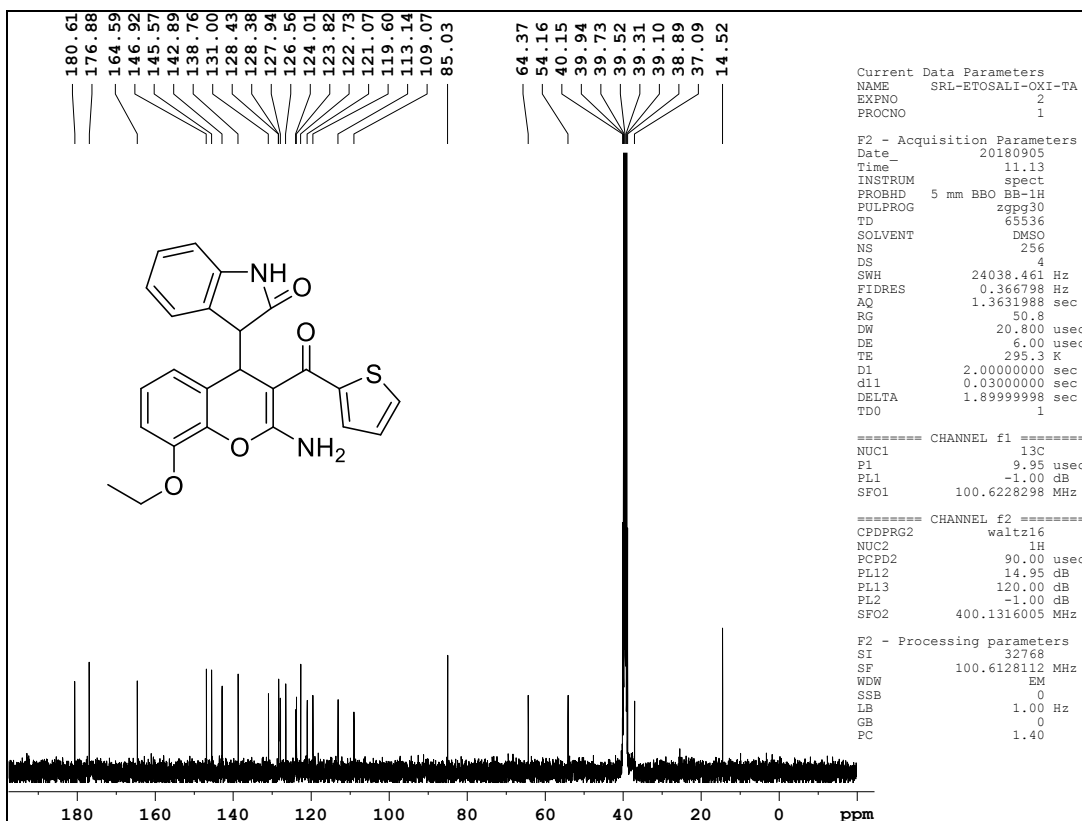

**Fig 26:**  $^1\text{H}$ ,  $^{13}\text{C}$  spectrum of 3-(2-amino-8-ethoxy-3-(thiophene-2-carbonyl)-4H-chromen-4-yl)indolin-2-one **71**

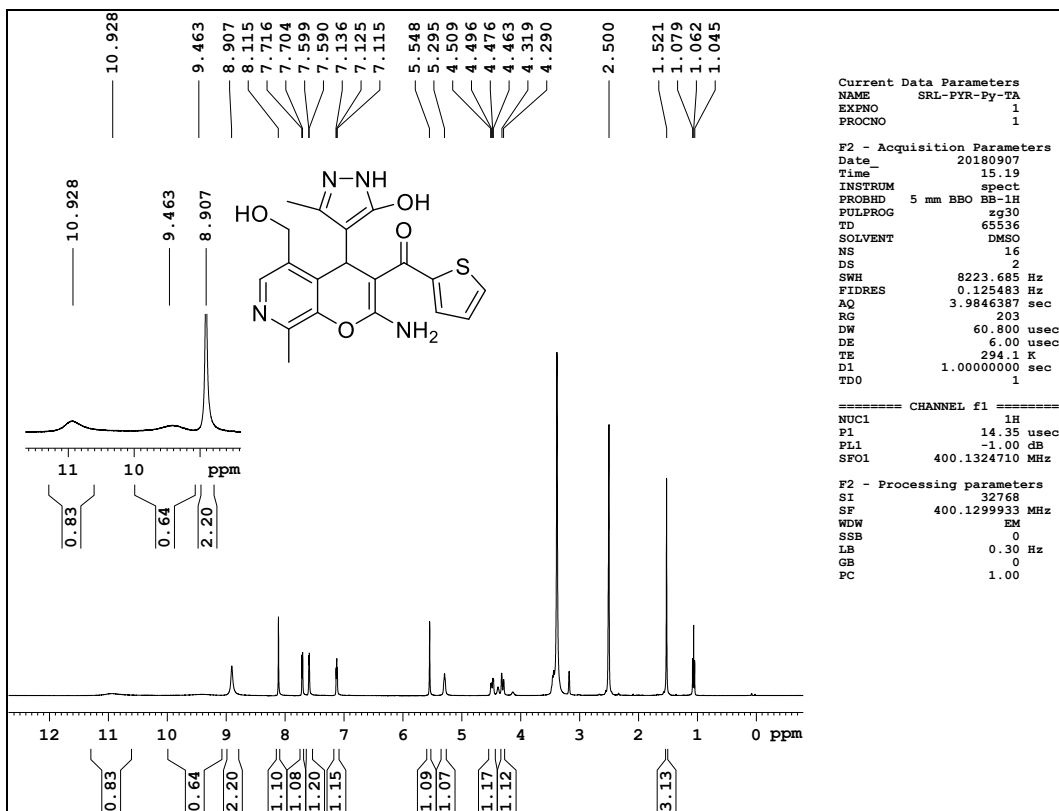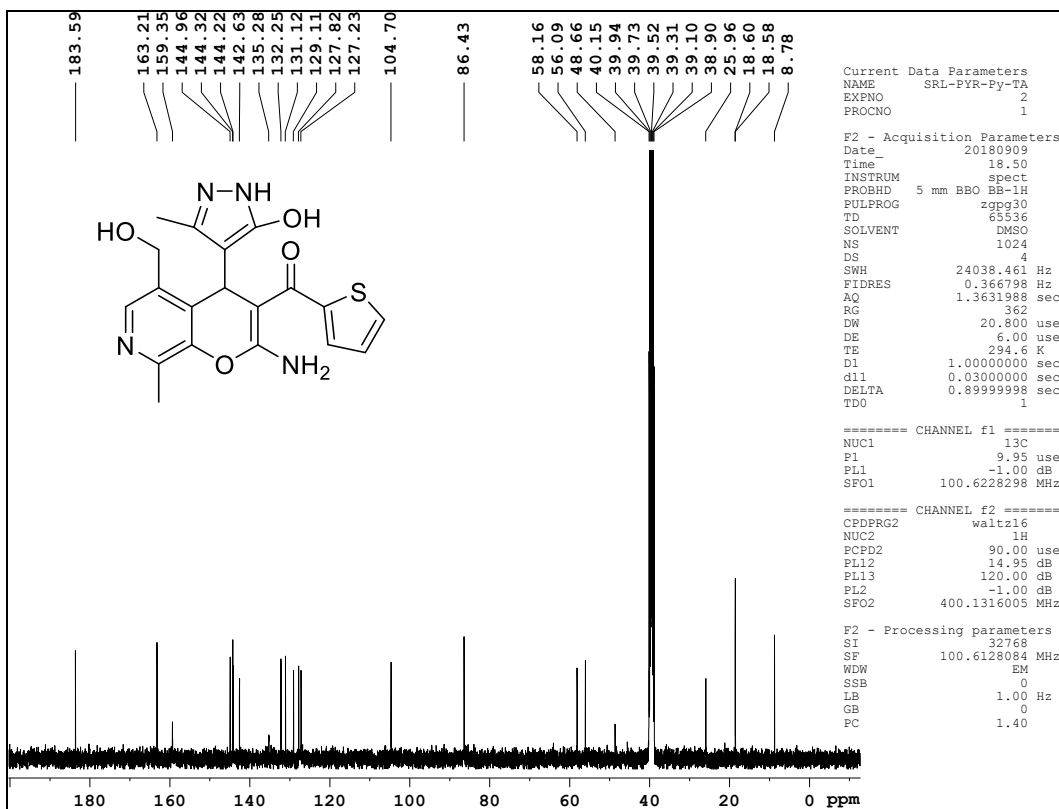

**Fig 27:**  $^1\text{H}$ ,  $^{13}\text{C}$  spectrum of (2-amino-4-(5-hydroxy-3-methyl-1H-pyrazol-4-yl)-5-(hydroxymethyl)-8-methyl-4H-pyrano[2,3-c]pyridin-3-yl)(thiophen-2-yl)methanone **7m**

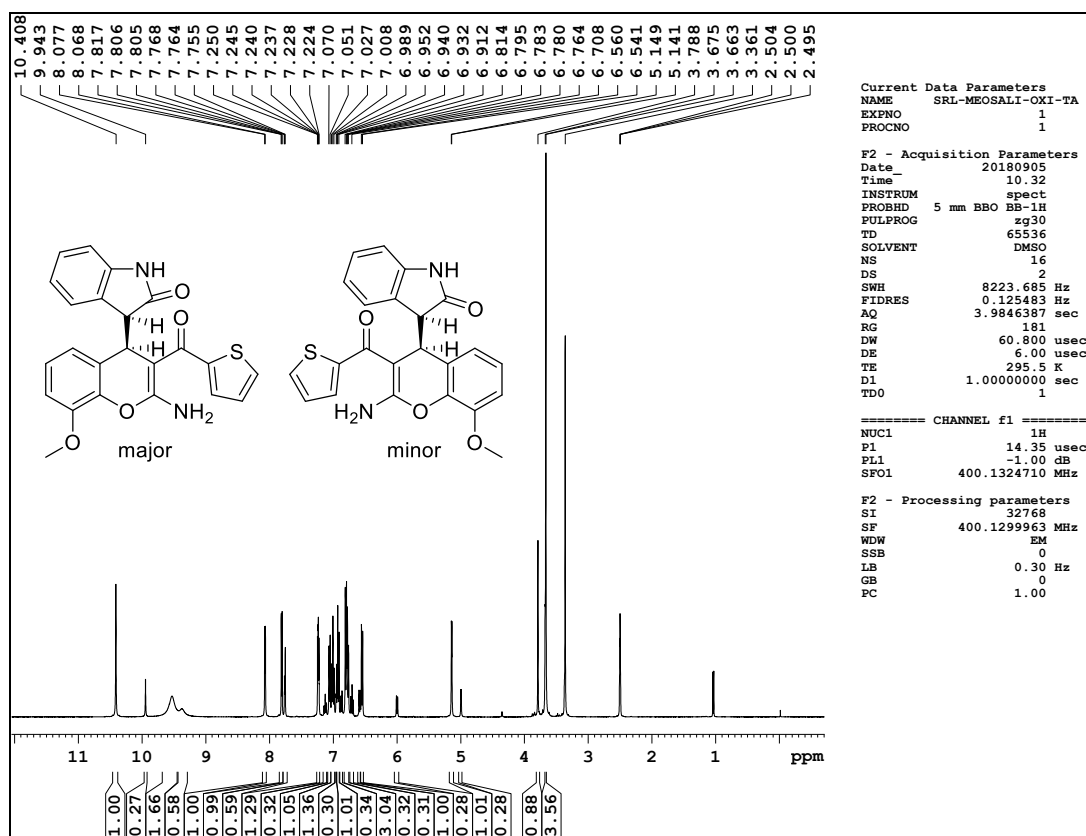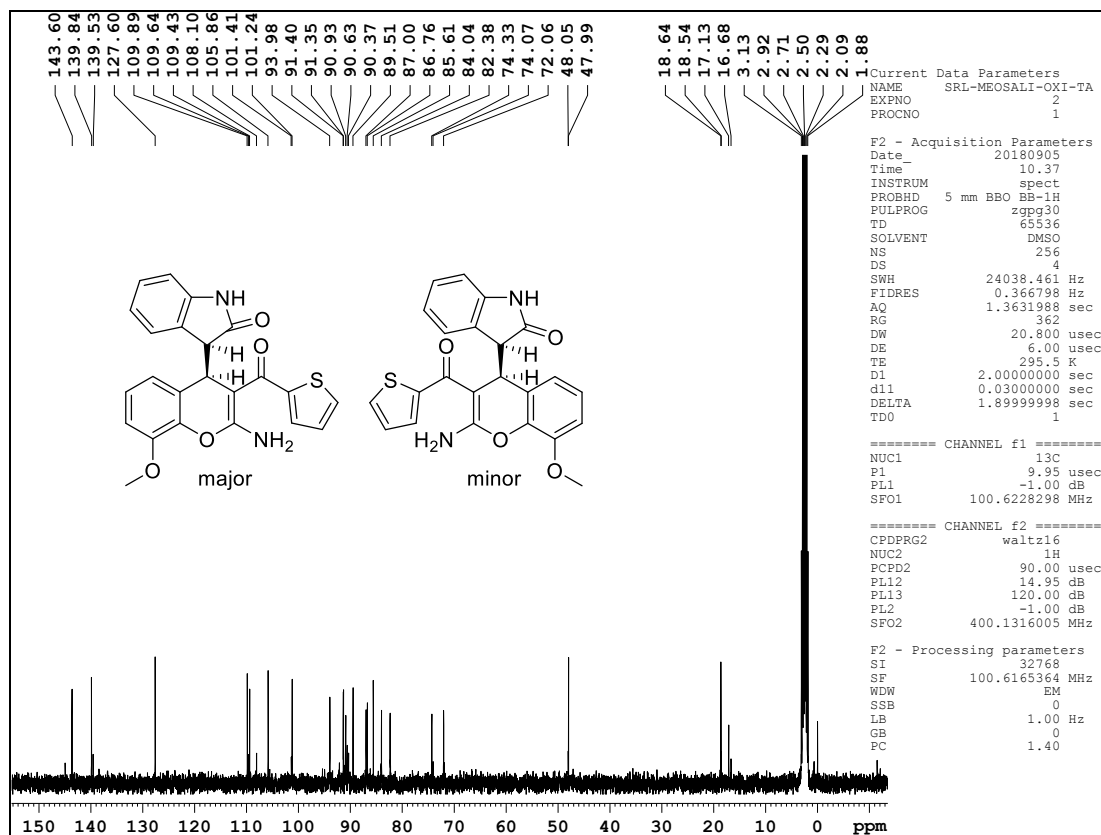

**Fig 27:**  $^1\text{H}$ ,  $^{13}\text{C}$  spectrum of 3-(2-amino-8-methoxy-3-(thiophene-2-carbonyl)-4*H*-chromen-4-yl)indolin-2-one **7n**
